# Supplementary material for: Phosphinoindenyl and phosphazidoindenyl complexes of lanthanum and samarium: synthesis, characterisation, and hydroamination catalysis
Source: Royal Society of Chemistry journal article supplement (doi:10.1039/d1dt03219d), 2021-12-24
Supplement: d1dt03219d1.pdf [file d1dt03219d1.pdf]

# Supplementary Information

## Phosphinoindenyl and Phosphazidoindenyl Complexes of Lanthanum and Samarium: Synthesis, Characterisation, and Hydroamination Catalysis

*Matthias R. Steiner,<sup>a</sup> Johann A. Hlina,<sup>\*a</sup> Johanna M. Uher,<sup>a</sup> Roland C. Fischer,<sup>a</sup> Dmytro*

*Neshchadin,<sup>b</sup> and Theresa Wilfling<sup>a</sup>*

<sup>a</sup> Institute of Inorganic Chemistry, Graz University of Technology,  
Stremayrgasse 9, 8010 Graz, Austria.

<sup>b</sup> Institute of Physical and Theoretical Chemistry, Graz University of Technology,  
Stremayrgasse 9, 8010 Graz, Austria.

### Table of Contents

|                                |    |
|--------------------------------|----|
| Molecular Structures: .....    | 2  |
| Crystallographic Data: .....   | 3  |
| Hydroamination Catalysis ..... | 5  |
| NMR Spectroscopy .....         | 8  |
| UV-Vis Spectroscopy .....      | 21 |
| Computational Data .....       | 22 |

## Molecular Structures:

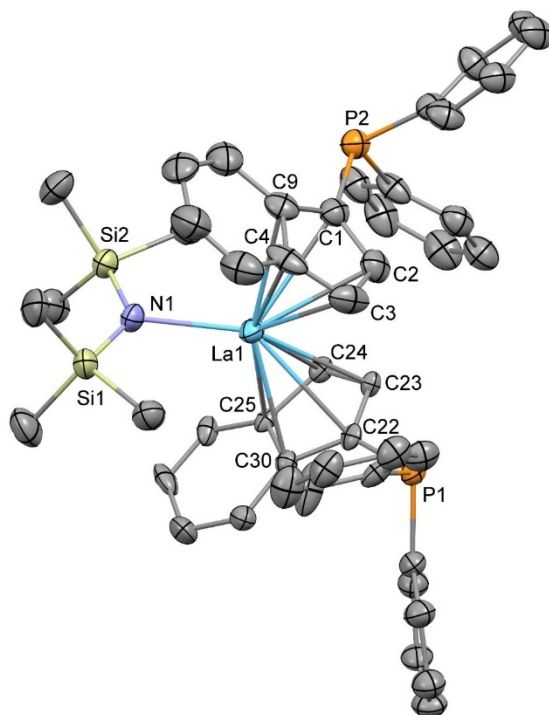

Figure S1. Molecular structure of **1-La**. Hydrogen atoms are omitted for clarity. Thermal ellipsoids drawn at 50 % probability. Selected distances (Å) and angles (deg): La1-N1: 2.339(3), La1-C1: 2.842(4), La1-C2: 2.851(5), La1-C3: 2.822(5), La1-C4: 2.835(5), La1-C9: 2.859(4), La1-C22: 2.89(2), La1-C23: 2.910(9), La1-C24: 2.861(8), La1-C25: 2.85(1), La1-C30: 2.88(1), C22-P1: 1.83(2), C1-P2: 1.807(4), La1-N1-Si1: 116.5(2), La1-N1-Si2: 114.0(2).

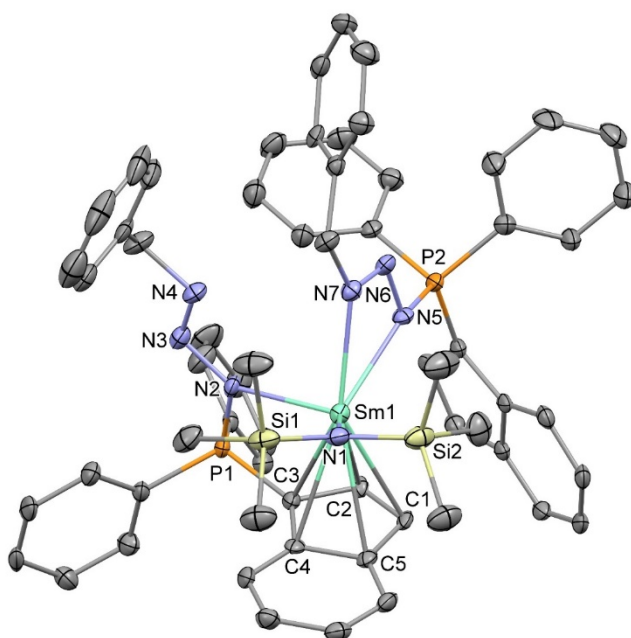

Figure S2. Molecular structure of **3-Sm**. Hydrogen atoms are omitted for clarity. Thermal ellipsoids drawn at 50 % probability. Selected distances (Å) and angles (deg): Sm1-N1: 2.266(4), Sm1-N2: 2.496(4), Sm1-N5: 2.534(4), Sm1-N7: 2.523(5), N2-N3: 1.397(6), N3-N4: 1.248(6), N5-N6: 1.380(6), N6-N7: 1.273(4), P1-N2: 1.638(4), P2-N5: 1.676(3), Sm1-C1: 2.874(5), Sm1-C2: 2.777(4), Sm1-C3: 2.739(5), Sm1-C4: 2.846(6), Sm1-C5: 2.934(6), C3-P1: 1.751(4), C29-P2: 1.717(5), N1-Sm1-N2: 120.6(1), N5-Sm1-N7: 50.6(1), N2-N3-N4: 111.2(4), N5-N6-N7: 108.9(4).

## Crystallographic Data:

Table S1. Crystallographic data of the complexes **1-La**, **1-Sm**, and **2**.

|                                                              | <b>1-La</b>                                                         | <b>1-Sm</b>                                                         | <b>2</b>                                                                        |
|--------------------------------------------------------------|---------------------------------------------------------------------|---------------------------------------------------------------------|---------------------------------------------------------------------------------|
| CCDC number                                                  | 2108459                                                             | 2108458                                                             | 2108460                                                                         |
| Empirical formula                                            | C <sub>48</sub> H <sub>50</sub> LaNP <sub>2</sub> Si <sub>2</sub>   | C <sub>48</sub> H <sub>50</sub> NP <sub>2</sub> Si <sub>2</sub> Sm  | C <sub>55</sub> H <sub>55</sub> LaN <sub>2</sub> P <sub>2</sub> Si <sub>2</sub> |
| Formula weight                                               | 897.92                                                              | 909.36                                                              | 1001.04                                                                         |
| Temperature /K                                               | 99.98                                                               | 100(2)                                                              | 150(2)                                                                          |
| Crystal system                                               | triclinic                                                           | monoclinic                                                          | monoclinic                                                                      |
| Space group                                                  | <i>P</i> -1                                                         | <i>P</i> 2 <sub>1</sub> / <i>n</i>                                  | <i>C</i> 2/ <i>c</i>                                                            |
| <i>a</i> /Å                                                  | 9.6450(6)                                                           | 9.9293(19)                                                          | 48.469(10)                                                                      |
| <i>b</i> /Å                                                  | 11.8885(6)                                                          | 37.125(7)                                                           | 13.677(3)                                                                       |
| <i>c</i> /Å                                                  | 19.4700(10)                                                         | 11.726(2)                                                           | 18.852(4)                                                                       |
| $\alpha$ /°                                                  | 79.178(3)                                                           | 90                                                                  | 90                                                                              |
| $\beta$ /°                                                   | 85.972(3)                                                           | 95.440(3)                                                           | 112.195(5)                                                                      |
| $\gamma$ /°                                                  | 82.708(3)                                                           | 90                                                                  | 90                                                                              |
| Volume /Å <sup>3</sup>                                       | 2172.6(2)                                                           | 4303.0(14)                                                          | 11571(4)                                                                        |
| <i>Z</i>                                                     | 2                                                                   | 4                                                                   | 8                                                                               |
| $\rho_{\text{calc}}$ /cm <sup>3</sup>                        | 1.373                                                               | 1.404                                                               | 1.149                                                                           |
| <i>M</i> /mm <sup>-1</sup>                                   | 1.145                                                               | 1.529                                                               | 0.867                                                                           |
| <i>F</i> (000)                                               | 920.0                                                               | 1860                                                                | 4112                                                                            |
| Crystal size /mm <sup>3</sup>                                | 0.17 x 0.14 x 0.10                                                  | 0.45 x 0.14 x 0.10                                                  | 0.37 x 0.30 x 0.22                                                              |
| 2 $\theta$ range for data collection /°                      | 2.132 to 53.996                                                     | 1.83 to 26.37                                                       | 2.72 to 26.35                                                                   |
| Index ranges                                                 | -12 ≤ <i>h</i> ≤ 12,<br>-15 ≤ <i>k</i> ≤ 15,<br>-24 ≤ <i>l</i> ≤ 24 | -12 ≤ <i>h</i> ≤ 12,<br>-46 ≤ <i>k</i> ≤ 46,<br>-14 ≤ <i>l</i> ≤ 14 | -58 ≤ <i>h</i> ≤ 60,<br>-17 ≤ <i>k</i> ≤ 17,<br>-23 ≤ <i>l</i> ≤ 23             |
| Reflections collected                                        | 114466                                                              | 34193                                                               | 45163                                                                           |
| Independent reflections                                      | 9498 [R(int) = 0.0655]                                              | 8807 [R(int) = 0.0371]                                              | 11798 [R(int) = 0.0409]                                                         |
| Data/restraints/parameters                                   | 9498 / 438 / 692                                                    | 8807 / 0 / 493                                                      | 11798 / 39 / 566                                                                |
| Goodness-of-fit on <i>F</i> <sup>2</sup>                     | 1.141                                                               | 1.218                                                               | 1.077                                                                           |
| Final <i>R</i> indexes [ <i>I</i> ≥ 2 $\sigma$ ( <i>I</i> )] | <i>R</i> 1 = 0.0512, <i>wR</i> 2 = 0.1110                           | <i>R</i> 1 = 0.0433, <i>wR</i> 2 = 0.0919                           | <i>R</i> 1 = 0.0378, <i>wR</i> 2 = 0.0918                                       |
| Final <i>R</i> indexes [all data]                            | <i>R</i> 1 = 0.0618, <i>wR</i> 2 = 0.1168                           | <i>R</i> 1 = 0.0465, <i>wR</i> 2 = 0.0934                           | <i>R</i> 1 = 0.0422, <i>wR</i> 2 = 0.0943                                       |
| Largest diff. peak/hole / e Å <sup>-3</sup>                  | 3.19 and -1.06                                                      | 1.772 and -1.095                                                    | 1.536 and -0.492                                                                |

Table S2. Crystallographic data of the complexes **3-La** and **3-Sm**.

|                                                      | <b>3-La</b>                                                                     | <b>3-Sm</b>                                                                      |
|------------------------------------------------------|---------------------------------------------------------------------------------|----------------------------------------------------------------------------------|
| CCDC number                                          | 2109013                                                                         | 2110760                                                                          |
| Empirical formula                                    | C <sub>69</sub> H <sub>72</sub> LaN <sub>7</sub> P <sub>2</sub> Si <sub>2</sub> | C <sub>69</sub> H <sub>72</sub> N <sub>7</sub> P <sub>2</sub> Si <sub>2</sub> Sm |
| Formula weight                                       | 1164.23                                                                         | 1175.67                                                                          |
| Temperature /K                                       | 150(2)                                                                          | 99.99                                                                            |
| Crystal system                                       | triclinic                                                                       | triclinic                                                                        |
| Space group                                          | <i>P</i> -1                                                                     | <i>P</i> -1                                                                      |
| <i>a</i> /Å                                          | 12.632(3)                                                                       | 12.6691(13)                                                                      |
| <i>b</i> /Å                                          | 13.456(3)                                                                       | 13.4210(13)                                                                      |
| <i>c</i> /Å                                          | 21.811(5)                                                                       | 21.6089(17)                                                                      |
| $\alpha$ /°                                          | 100.696(4)                                                                      | 100.322(5)                                                                       |
| $\beta$ /°                                           | 97.570(4)                                                                       | 97.953(5)                                                                        |
| $\gamma$ /°                                          | 115.177(3)                                                                      | 115.115(5)                                                                       |
| Volume /Å <sup>3</sup>                               | 3203.0(12)                                                                      | 3176.8(5)                                                                        |
| <i>Z</i>                                             | 2                                                                               | 2                                                                                |
| $\rho_{\text{calc}}$ /cm <sup>3</sup>                | 1.303                                                                           | 1.325                                                                            |
| <i>M</i> /mm <sup>-1</sup>                           | 0.800                                                                           | 1.059                                                                            |
| F(000)                                               | 1300                                                                            | 1310                                                                             |
| Crystal size /mm <sup>3</sup>                        | 0.34 x 0.15 x 0.09                                                              | 0.34 x 0.20 x 0.05                                                               |
| 2 $\theta$ range for data collection /°              | 1.736 to 26.427                                                                 | 1.756 to 28.000                                                                  |
| Index ranges                                         | -15<= <i>h</i> <=15,<br>-16<= <i>k</i> <=16,<br>-27<= <i>l</i> <=27             | -16<= <i>h</i> <=16,<br>-17<= <i>k</i> <=17,<br>-28<= <i>l</i> <=28              |
| Reflections collected                                | 25997                                                                           | 55667                                                                            |
| Independent reflections                              | 12976 [R(int) = 0.1022]                                                         | 12050 [R(int) = 0.0835]                                                          |
| Data/restraints/parameters                           | 12976 / 0 / 673                                                                 | 14510 / 0 / 673                                                                  |
| Goodness-of-fit on F <sup>2</sup>                    | 1.175                                                                           | 1.058                                                                            |
| Final R indexes [ <i>I</i> ≥2 $\sigma$ ( <i>I</i> )] | R1 = 0.0742, wR2 = 0.1903                                                       | R1 = 0.0526, wR2 = 0.1003                                                        |
| Final R indexes [all data]                           | R1 = 0.0847, wR2 = 0.1967                                                       | R1 = 0.0710, wR2 = 0.1084                                                        |
| Largest diff. peak/hole / e Å <sup>-3</sup>          | 1.927 and -1.364                                                                | 1.89 and -1.34                                                                   |

## Hydroamination Catalysis:

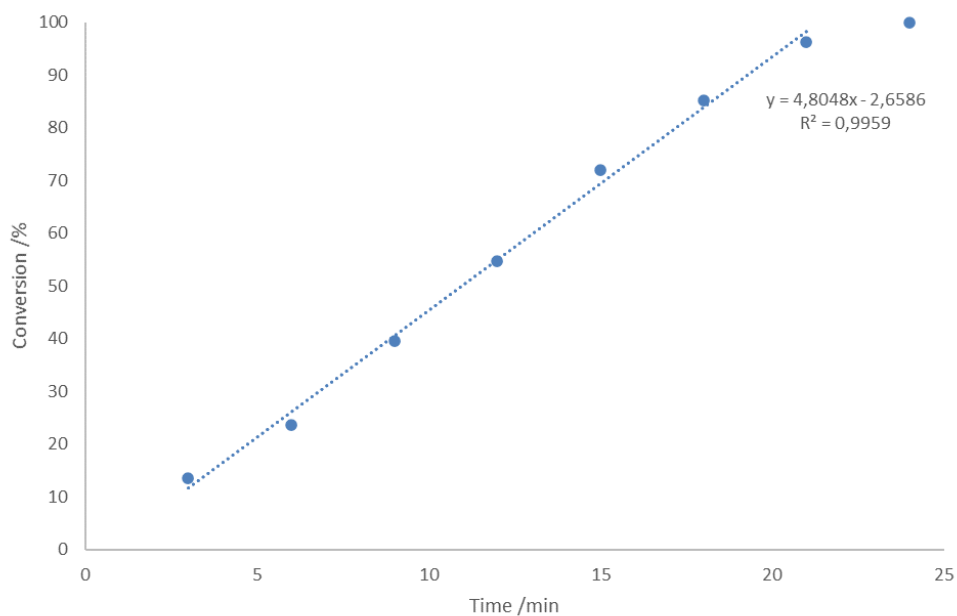

Figure S3. Conversion rates of the hydroamination/cyclisation of 2,2-diphenylpent-4-ene-1-amine using 2 mol% of **1-La** as catalyst at ambient temperature in benzene. The trend line is drawn as dotted line and excludes the full conversion data point.

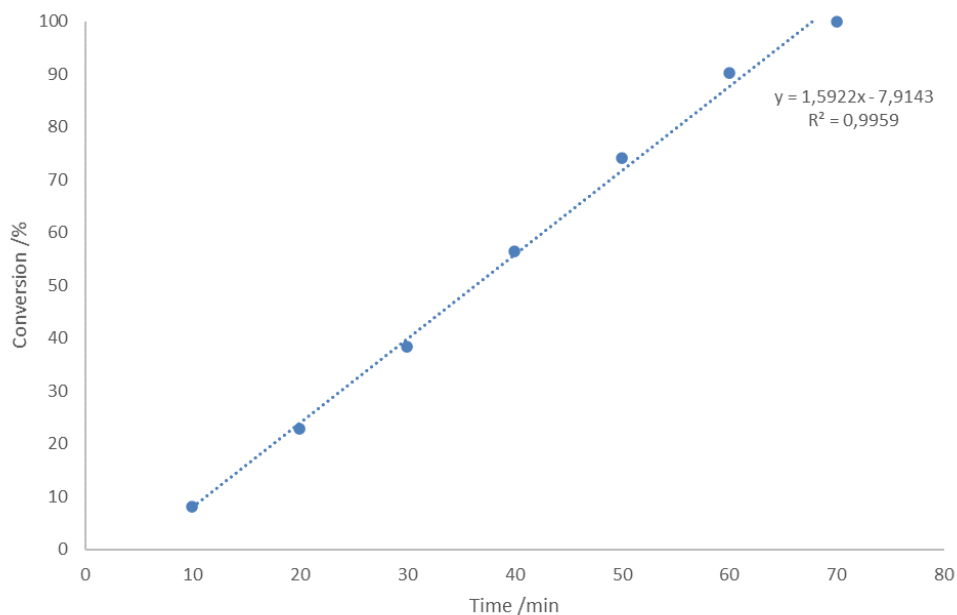

Figure S4. Conversion rates of the hydroamination/cyclisation of 2,2-diphenylpent-4-ene-1-amine using 2 mol% of **1-Sm** as catalyst at ambient temperature in benzene. The trend line is drawn as dotted line and excludes the full conversion data point.

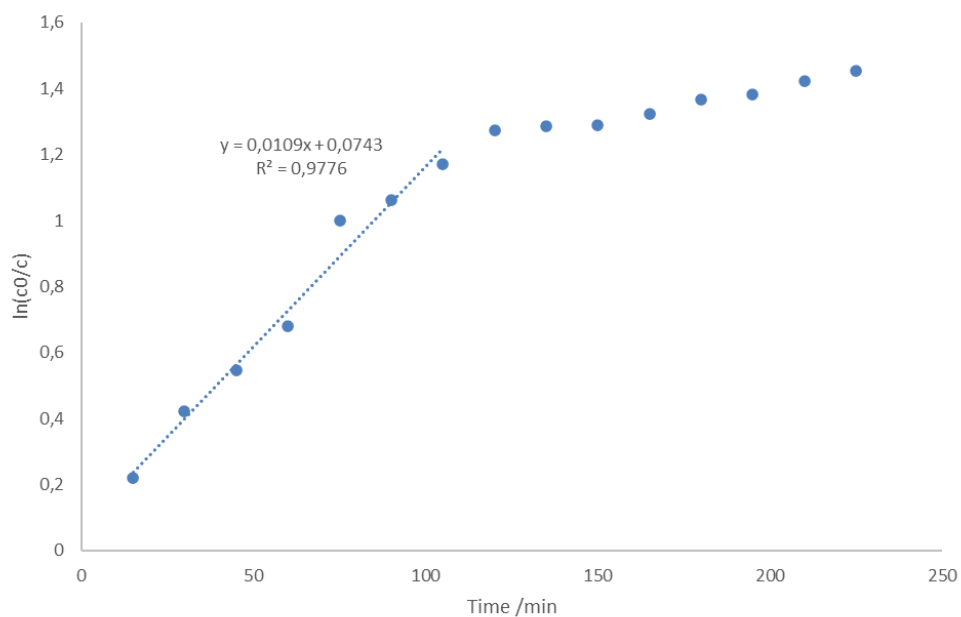

Figure S5. The  $\ln(c_0/c)$  ( $c_0$  = initial substrate concentration,  $c$  = substrate concentration at certain reaction time) versus reaction time for the hydroamination/cyclisation of 2,2-diphenylpent-4-ene-1-amine using 2 mol% of **2** as catalyst at ambient temperature in benzene. The trend line is drawn as dotted line for early reaction phase only.

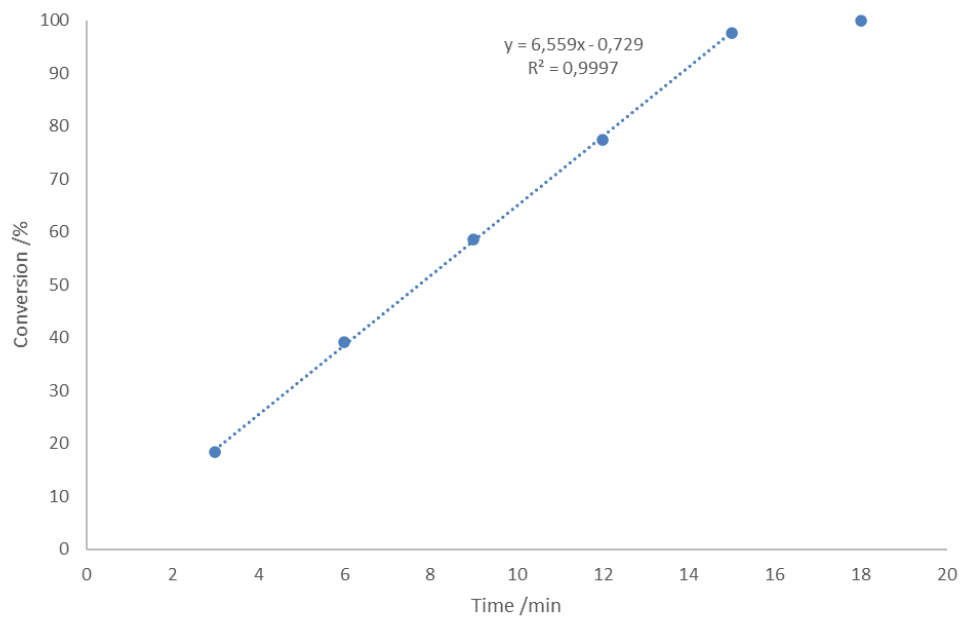

Figure S6. Conversion rates of the hydroamination/cyclisation of 2,2-diphenylpent-4-ene-1-amine using 2 mol% of **3-La** as catalyst at ambient temperature in benzene. The trend line is drawn as dotted line and excludes the full conversion data point.

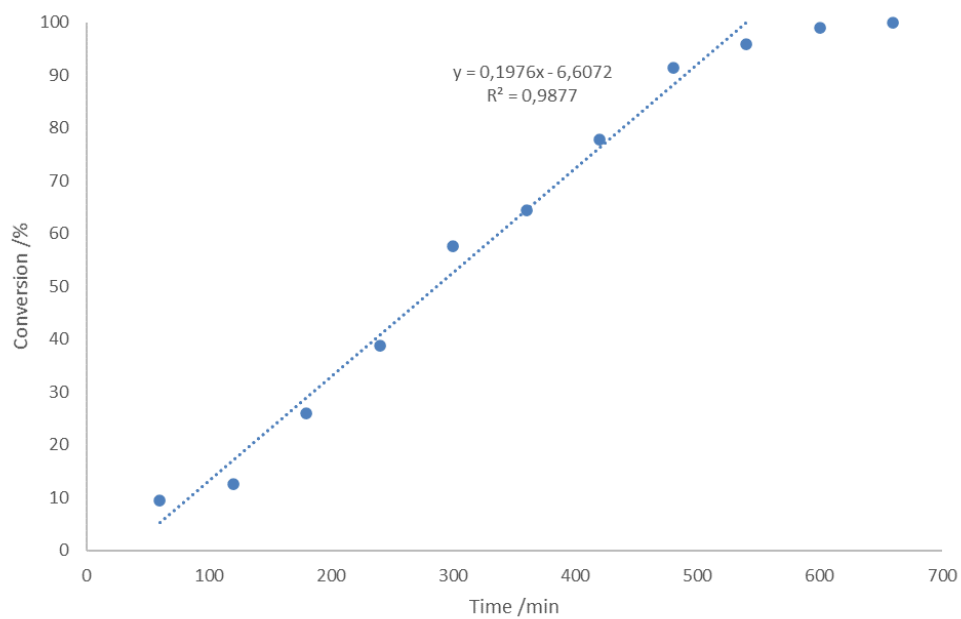

Figure S7. Conversion rates of the hydroamination/cyclisation of 2,2-diphenylpent-4-ene-1-amine using 2 mol% of **3-Sm** as catalyst at ambient temperature in benzene. The trend line is drawn as dotted line and excludes the last two data points nearing full conversion.

# NMR Spectroscopy:

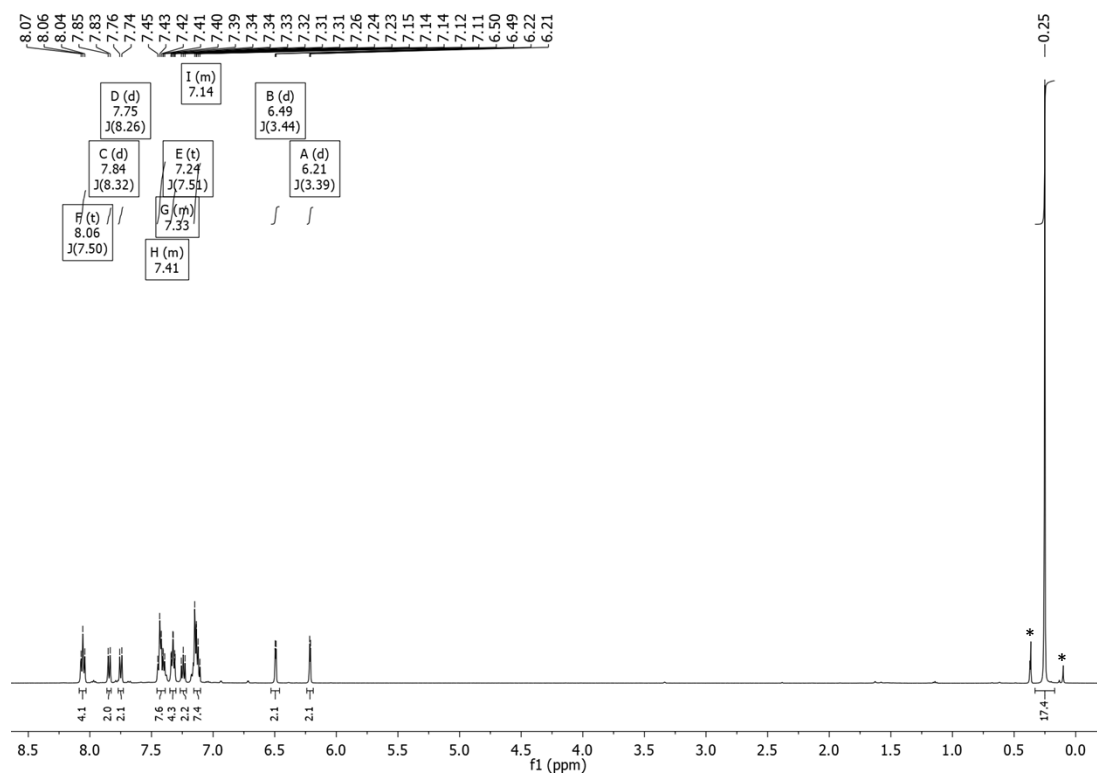

Figure S8.  $^1\text{H}$  NMR spectrum of **1-La** recorded from a solution in benzene- $d_6$  at 298 K. Trace impurities are marked with an asterisk.

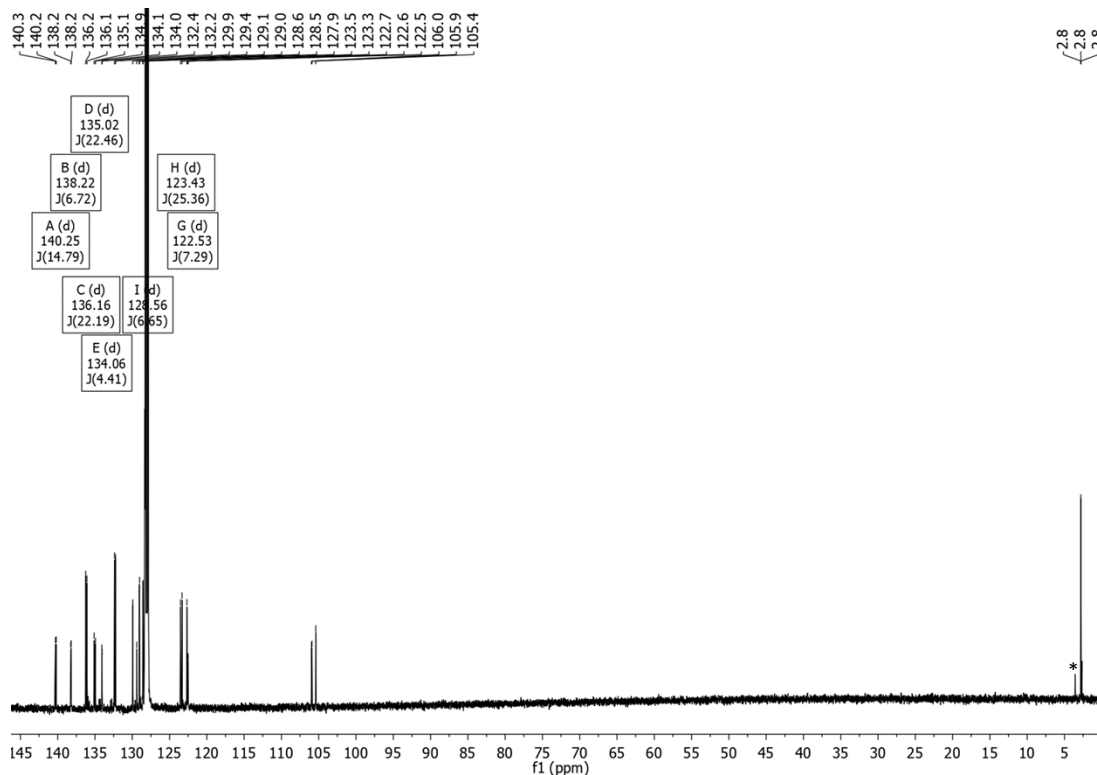

Figure S9.  $^{13}\text{C}\{^1\text{H}\}$  NMR spectrum of **1-La** recorded from a solution in benzene- $d_6$  at 298 K. Trace impurities are marked with an asterisk.



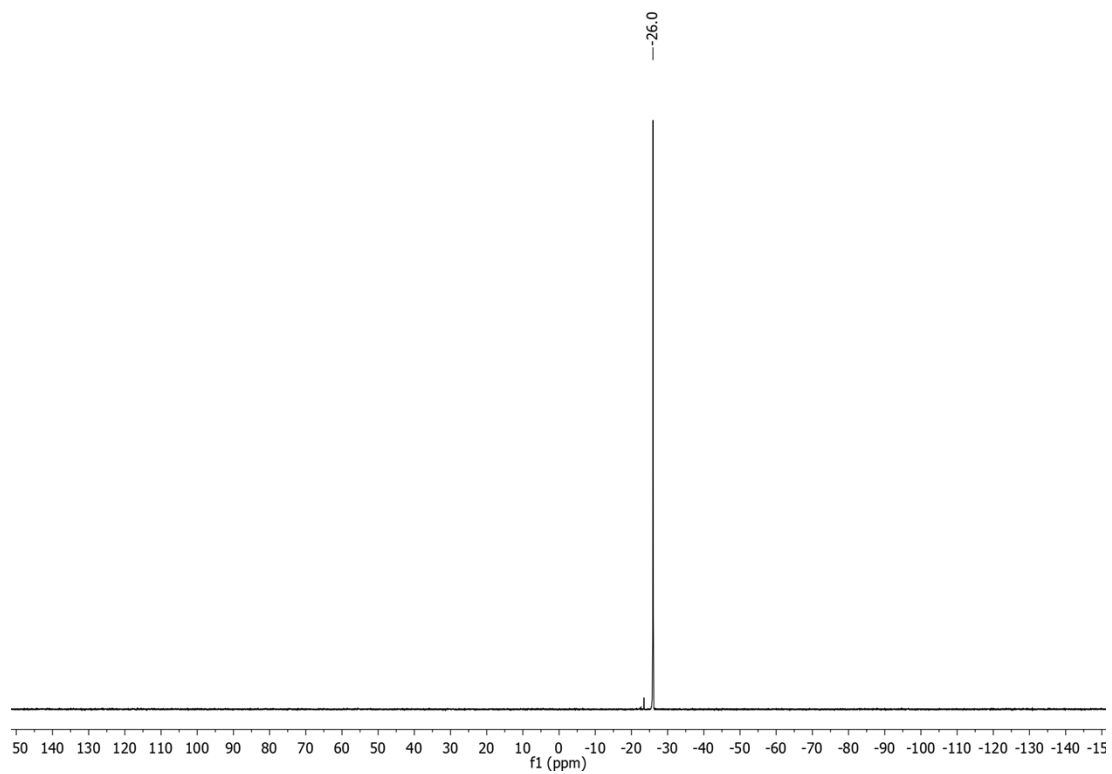

Figure S10.  $^{31}\text{P}\{^1\text{H}\}$  NMR spectrum of **1-La** recorded from a solution in benzene- $d_6$  at 298 K.

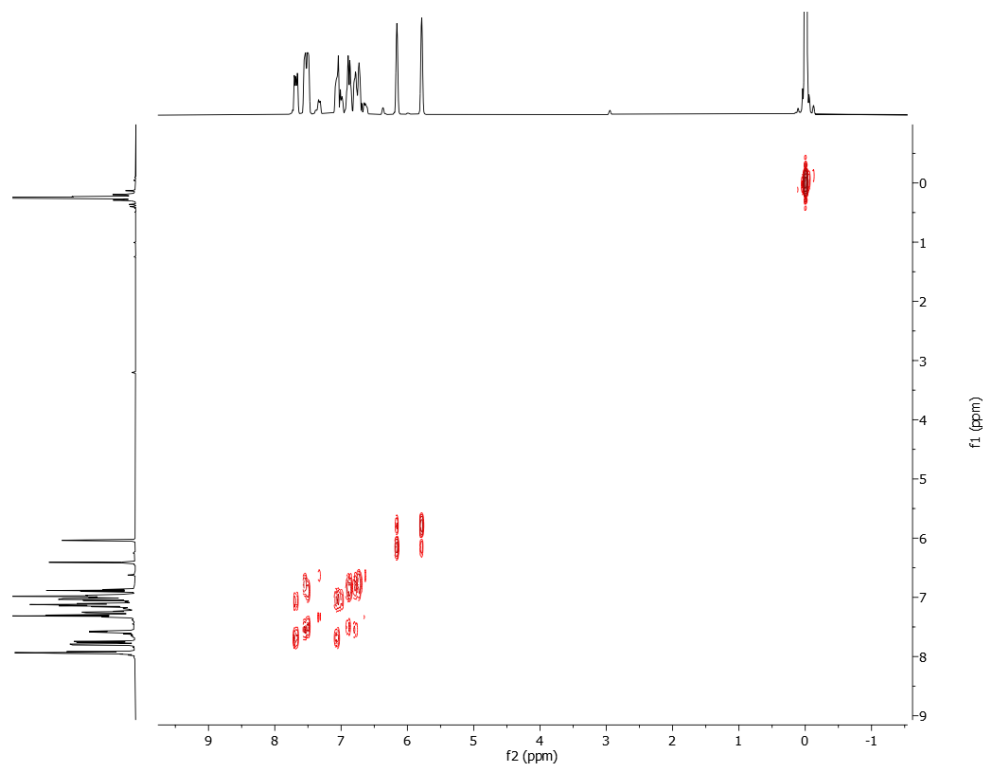

Figure S11.  $^1\text{H}$ - $^1\text{H}$  COSY NMR spectrum of **1-La** recorded from a solution in benzene- $d_6$  at 298 K.

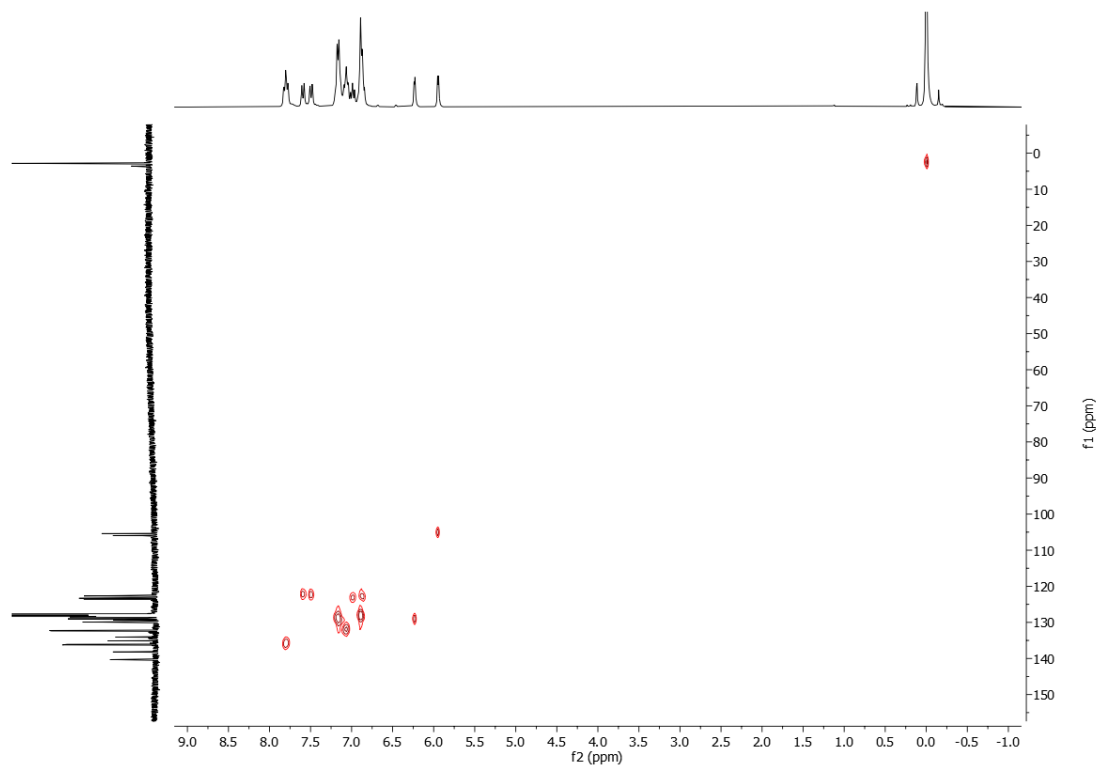

Figure S12.  $^1\text{H}$ - $^{13}\text{C}$  HSQC NMR spectrum of **1-La** recorded from a solution in benzene- $d_6$  at 298 K.

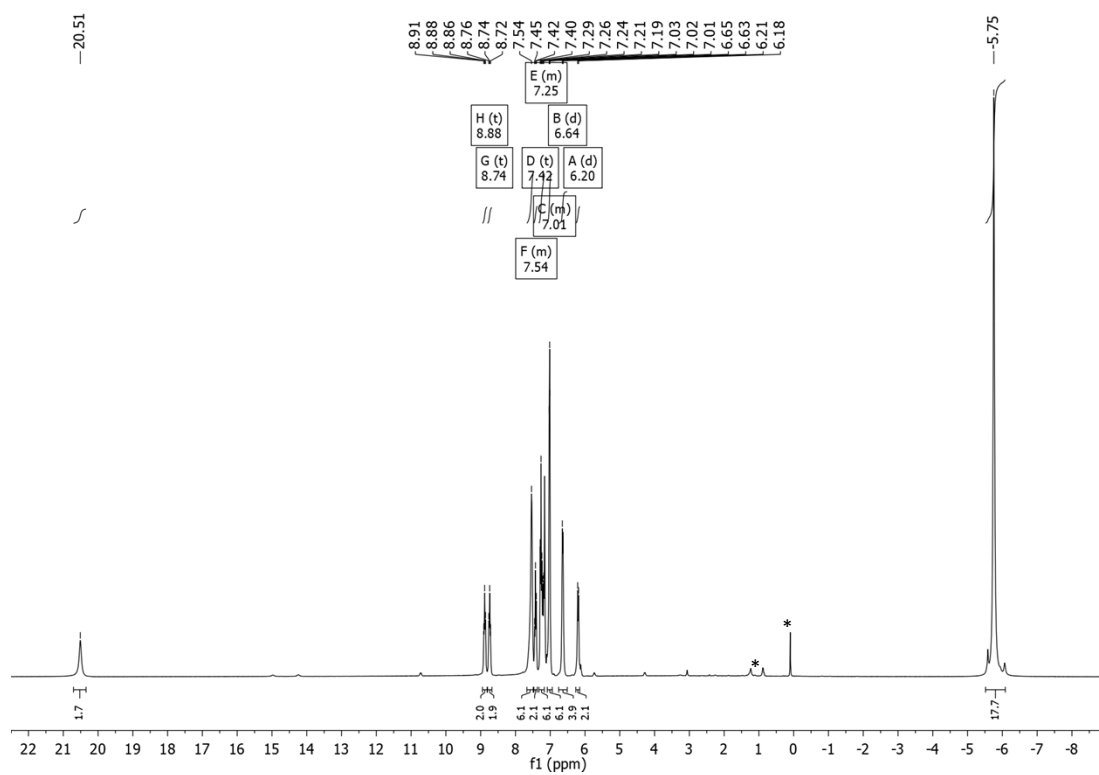

Figure S13.  $^1\text{H}$  NMR spectrum of **1-Sm** recorded from a solution in benzene- $d_6$  at 298 K. Trace impurities are marked with an asterisk.

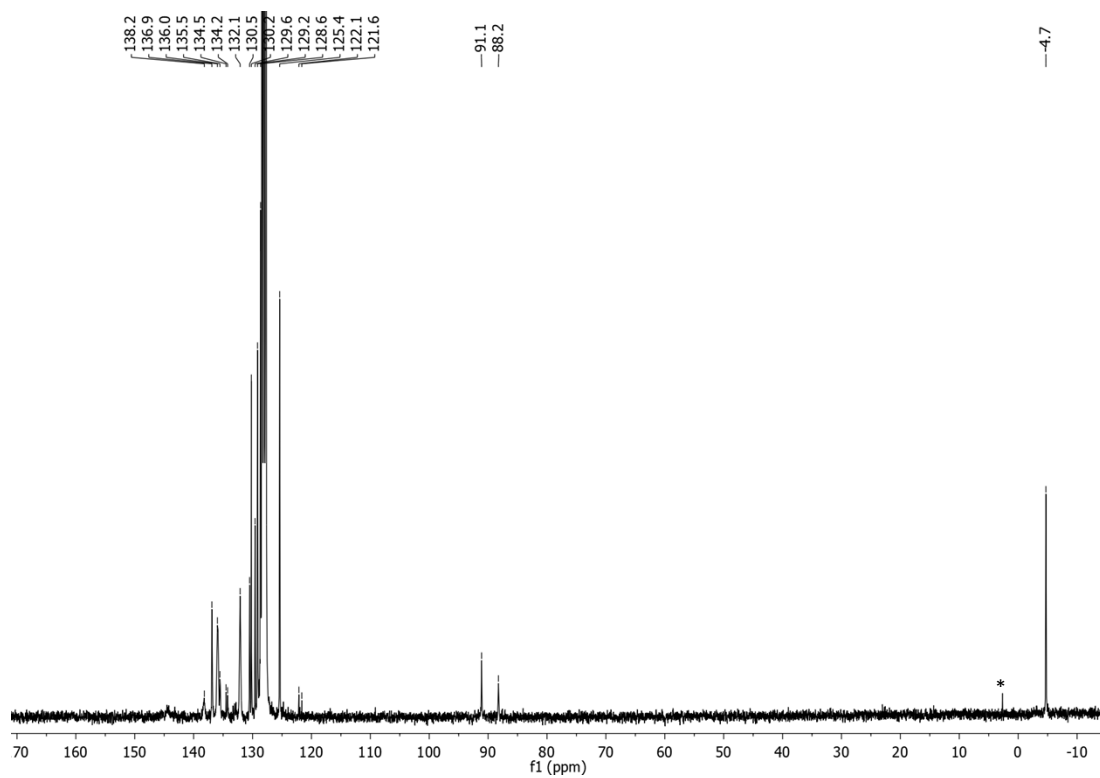

Figure S14.  $^{13}\text{C}\{^1\text{H}\}$  NMR spectrum of **1-5m** recorded from a solution in benzene- $d_6$  at 298 K. Trace impurities are marked with an asterisk.

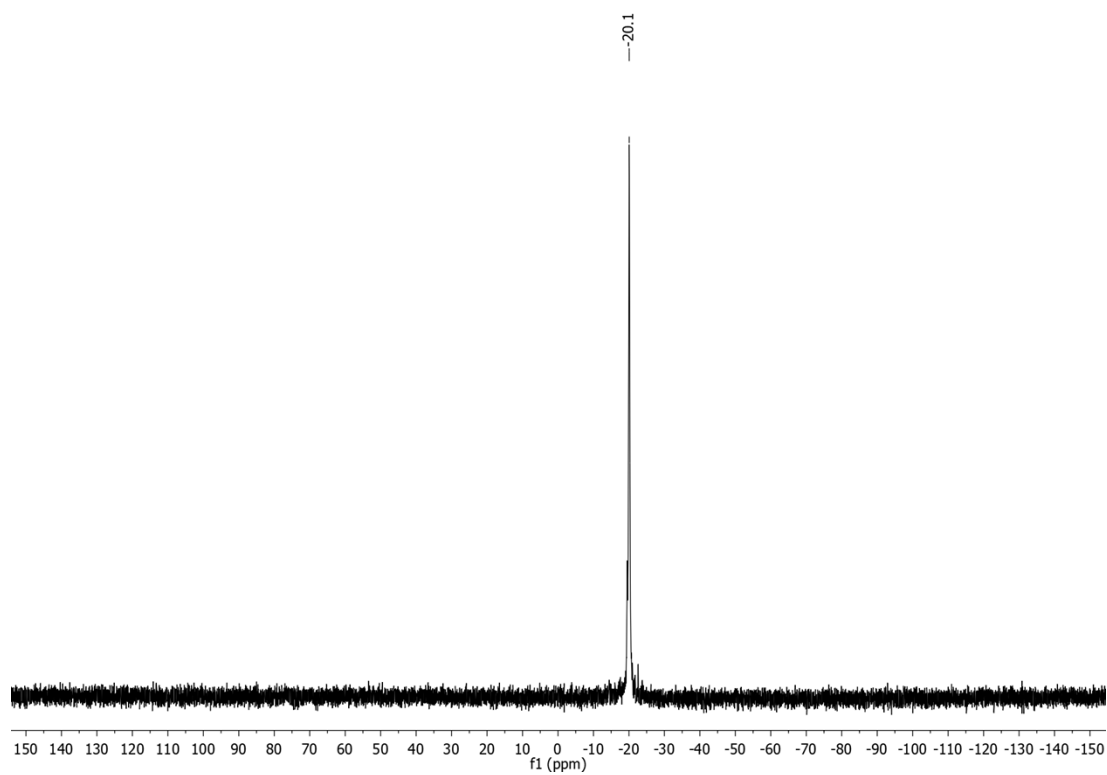

Figure S15.  $^{31}\text{P}\{^1\text{H}\}$  NMR spectrum of **1-5m** recorded from a solution in benzene- $d_6$  at 298 K.

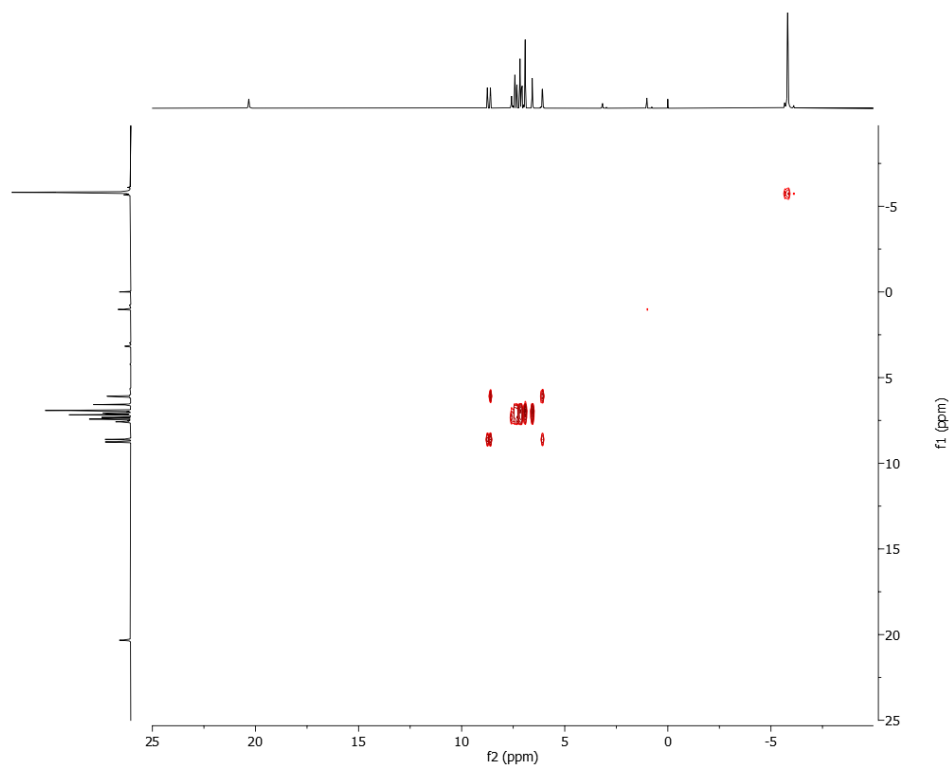

Figure S16. <sup>1</sup>H-<sup>1</sup>H COSY NMR spectrum of **1-5m** recorded from a solution in benzene-d<sub>6</sub> at 298 K.

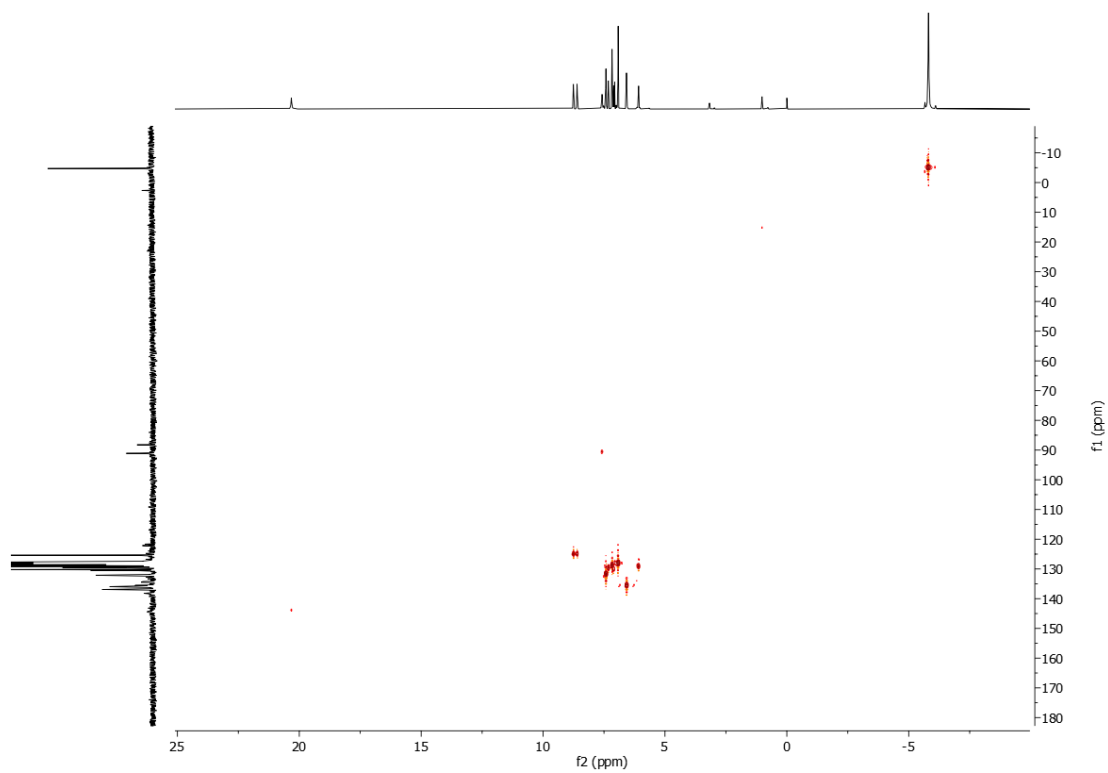

Figure S17. <sup>1</sup>H-<sup>13</sup>C HSQC NMR spectrum of **1-La** recorded from a solution in benzene-d<sub>6</sub> at 298 K.

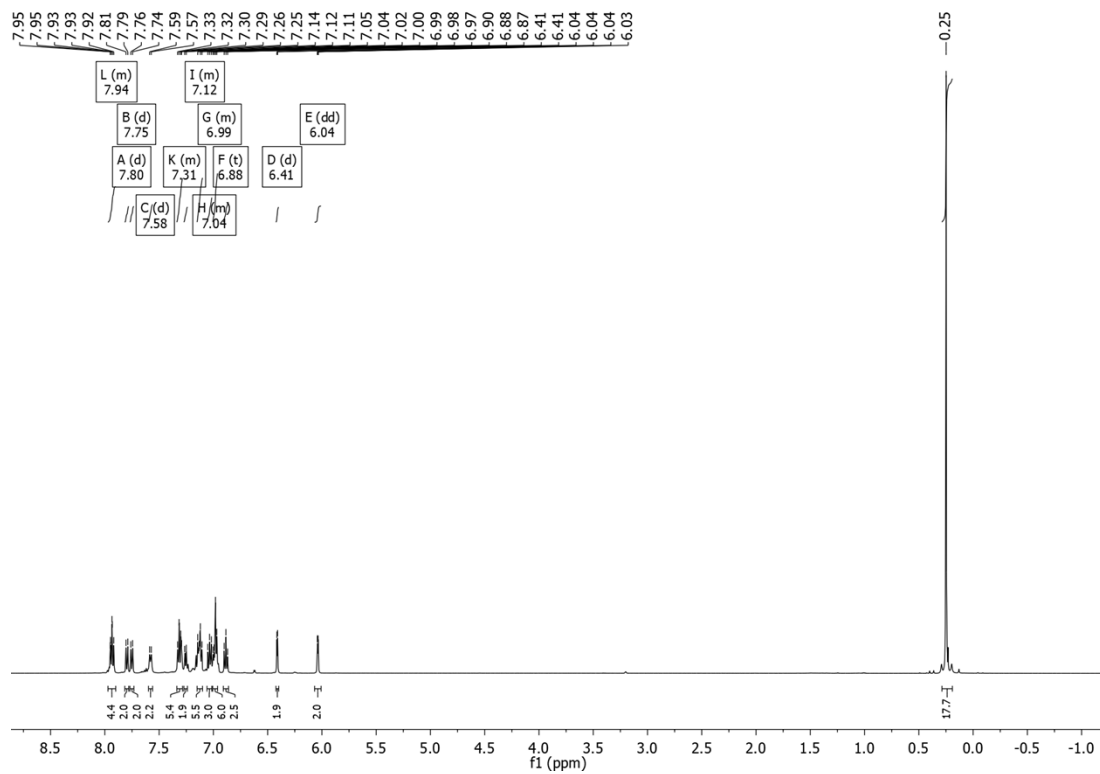

Figure S18.  $^1\text{H}$  NMR spectrum of **2** recorded from a solution in benzene- $d_6$  at 298 K.

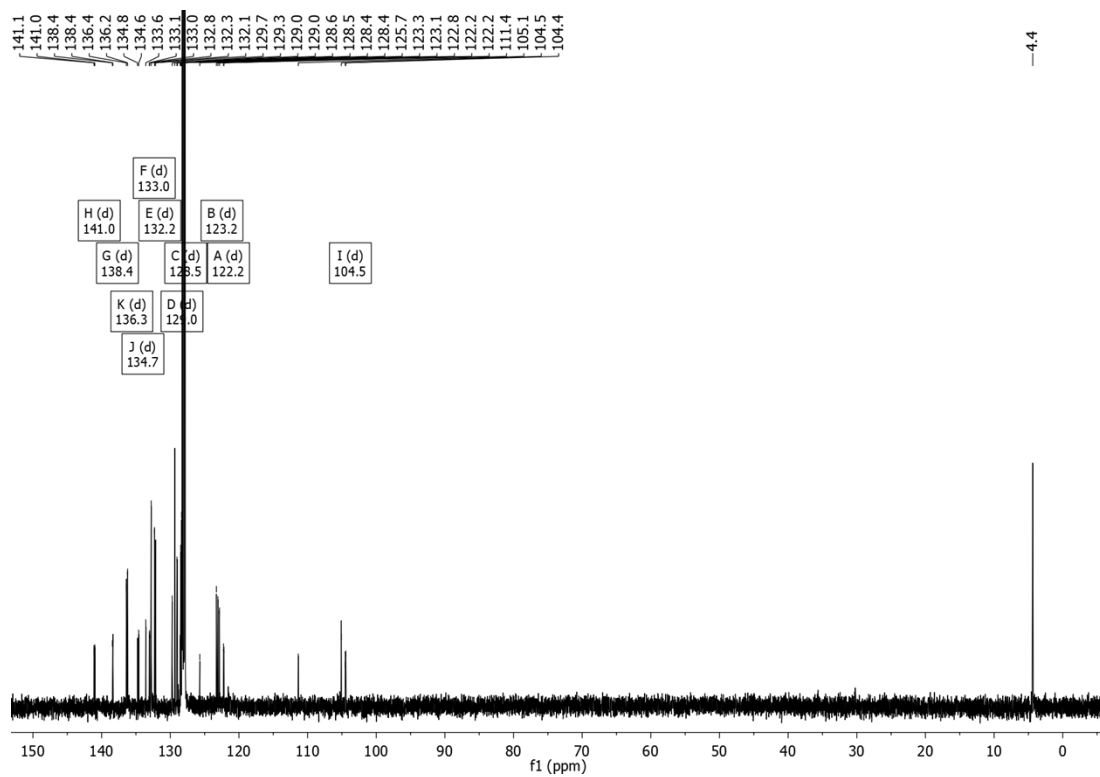

Figure S19.  $^{13}\text{C}\{^1\text{H}\}$  NMR spectrum of **2** recorded from a solution in benzene- $d_6$  at 298 K.

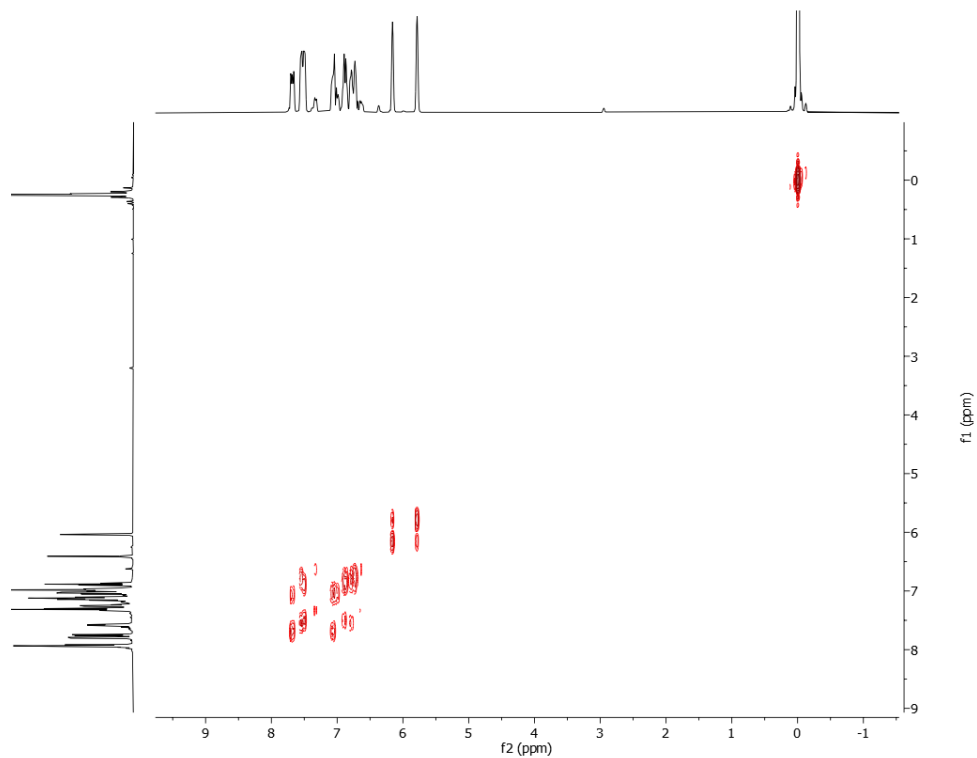

Figure S20.  $^1\text{H}$ - $^1\text{H}$  COSY NMR spectrum of **2** recorded from a solution in benzene- $d_6$  at 298 K.

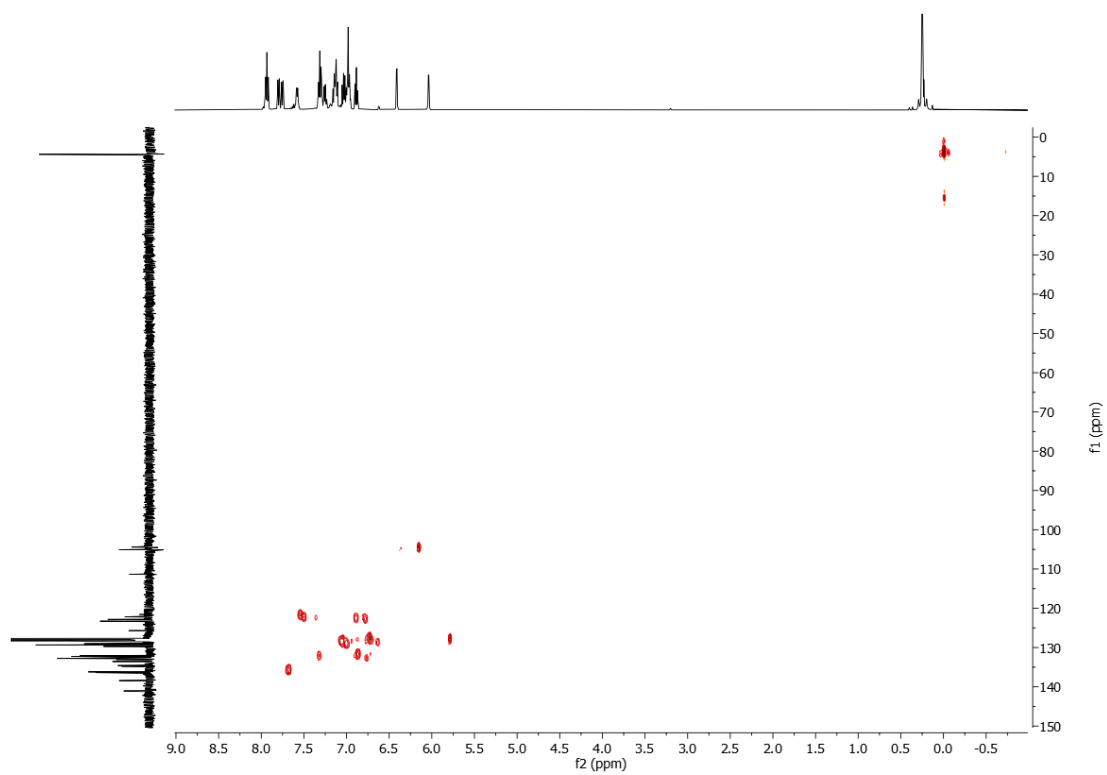

Figure S21.  $^1\text{H}$ - $^{13}\text{C}$  HSQC NMR spectrum of **1-La** recorded from a solution in benzene- $d_6$  at 298 K.

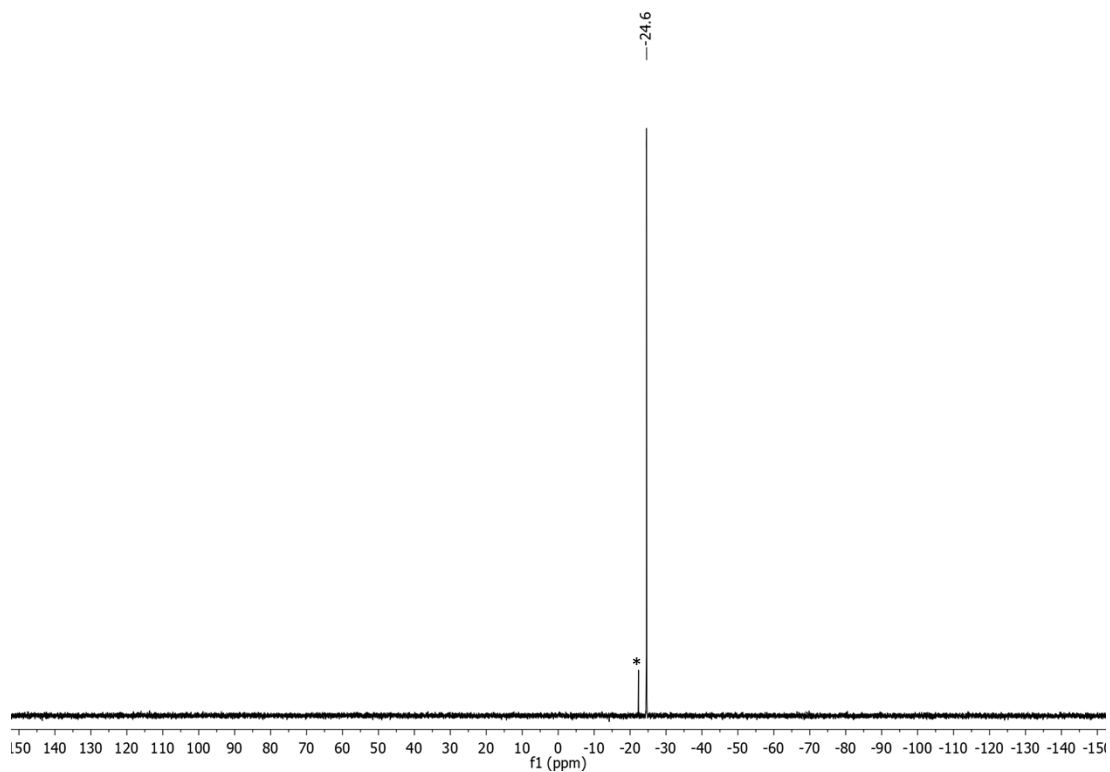

Figure S22.  $^{31}\text{P}\{^1\text{H}\}$  NMR spectrum of **2** recorded from a solution in benzene- $d_6$  at 298 K. Trace impurities are marked with an asterisk.

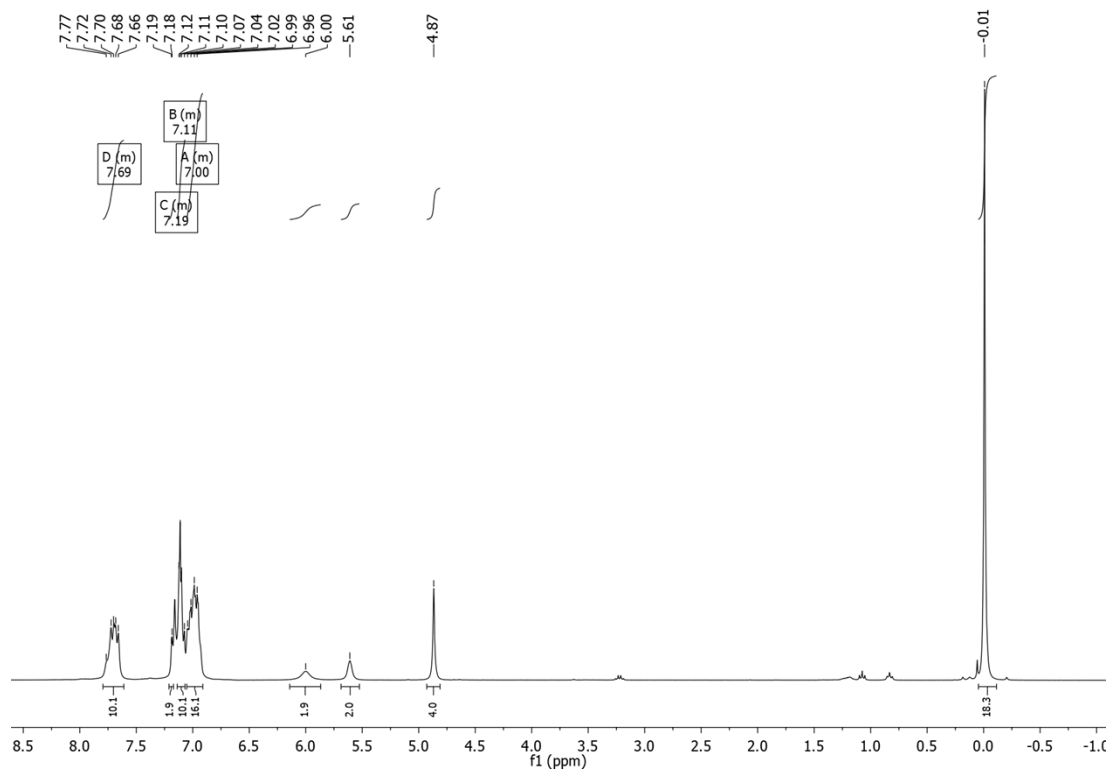

Figure S23.  $^1\text{H}$  NMR spectrum of **3-La** recorded from a solution in benzene- $d_6$  at 298 K.

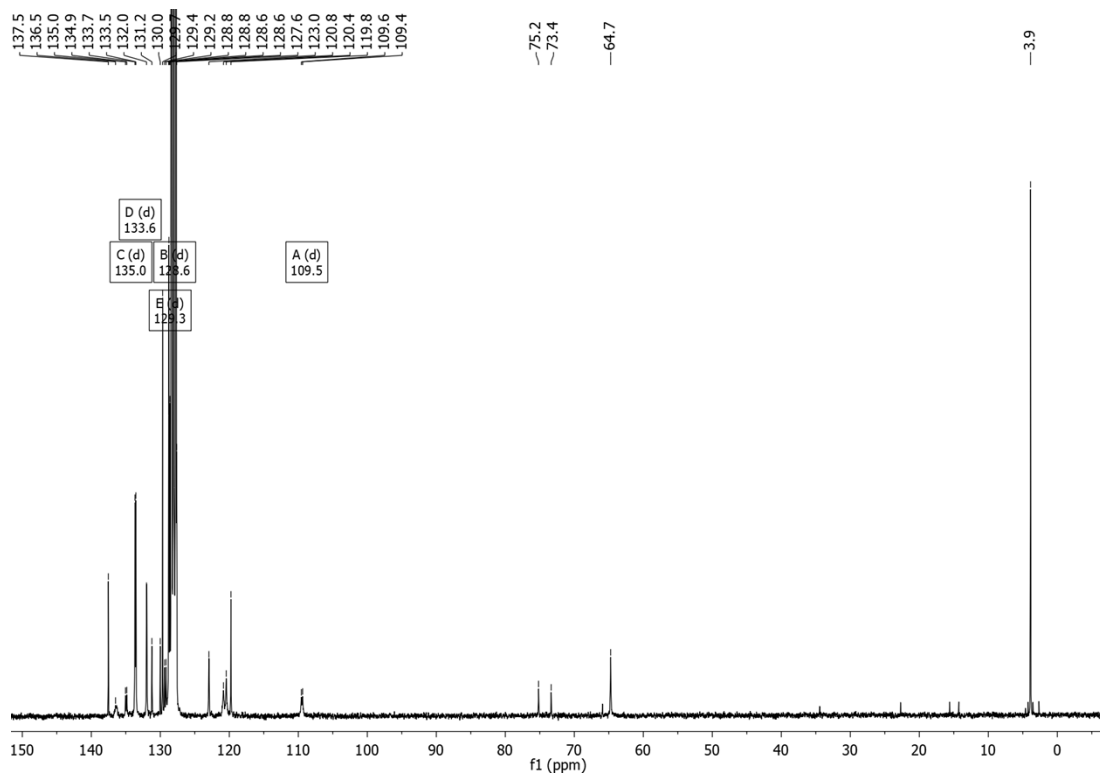

Figure 24.  $^{13}\text{C}\{^1\text{H}\}$  NMR spectrum of **3-La** recorded from a solution in benzene- $d_6$  at 298 K.

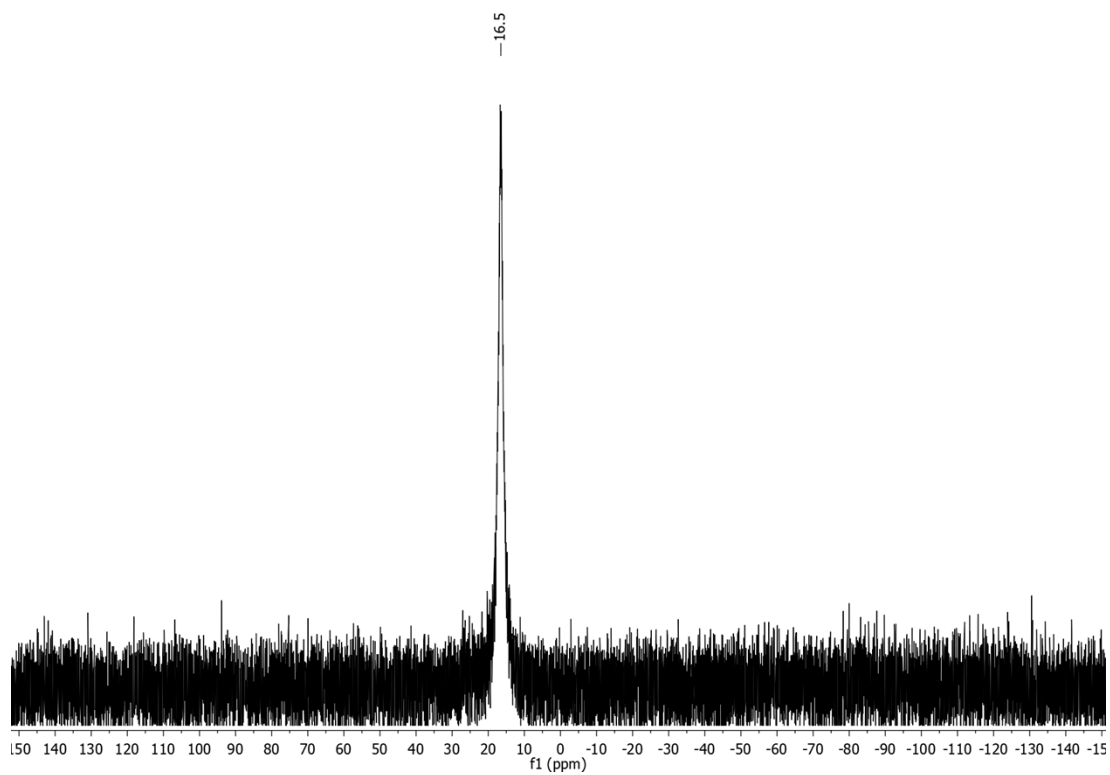

Figure S25.  $^{31}\text{P}\{^1\text{H}\}$  NMR spectrum of **3-La** recorded from a solution in benzene- $d_6$  at 298 K.



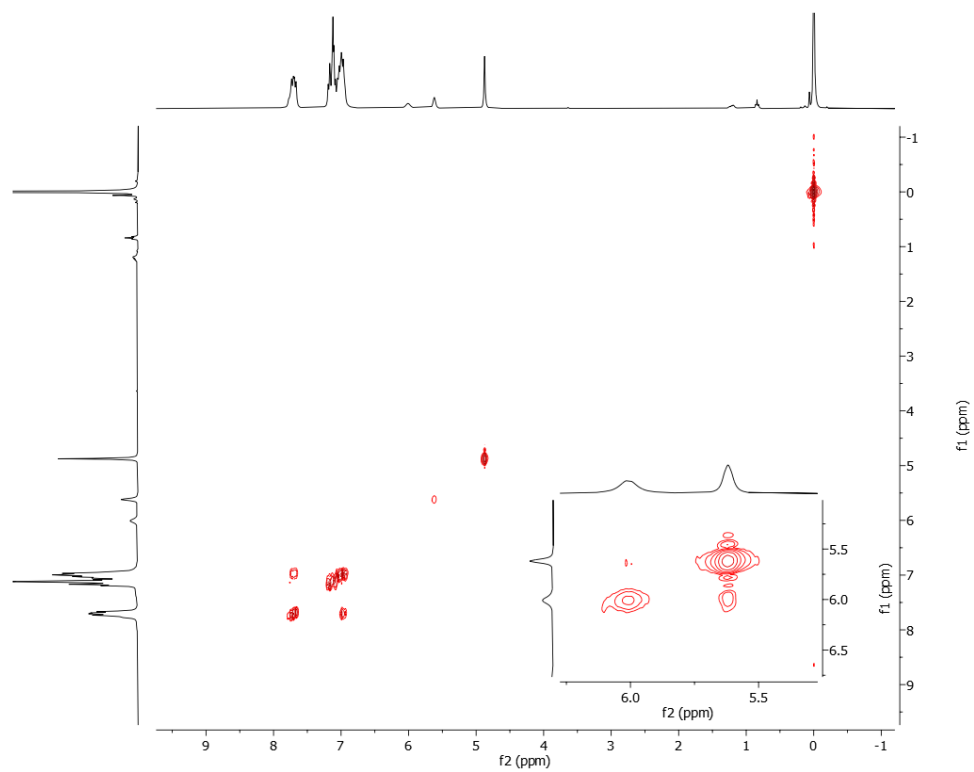

Figure S26.  $^1\text{H}$ - $^1\text{H}$  COSY NMR spectrum of **3-La** recorded from a solution in benzene- $d_6$  at 298 K.

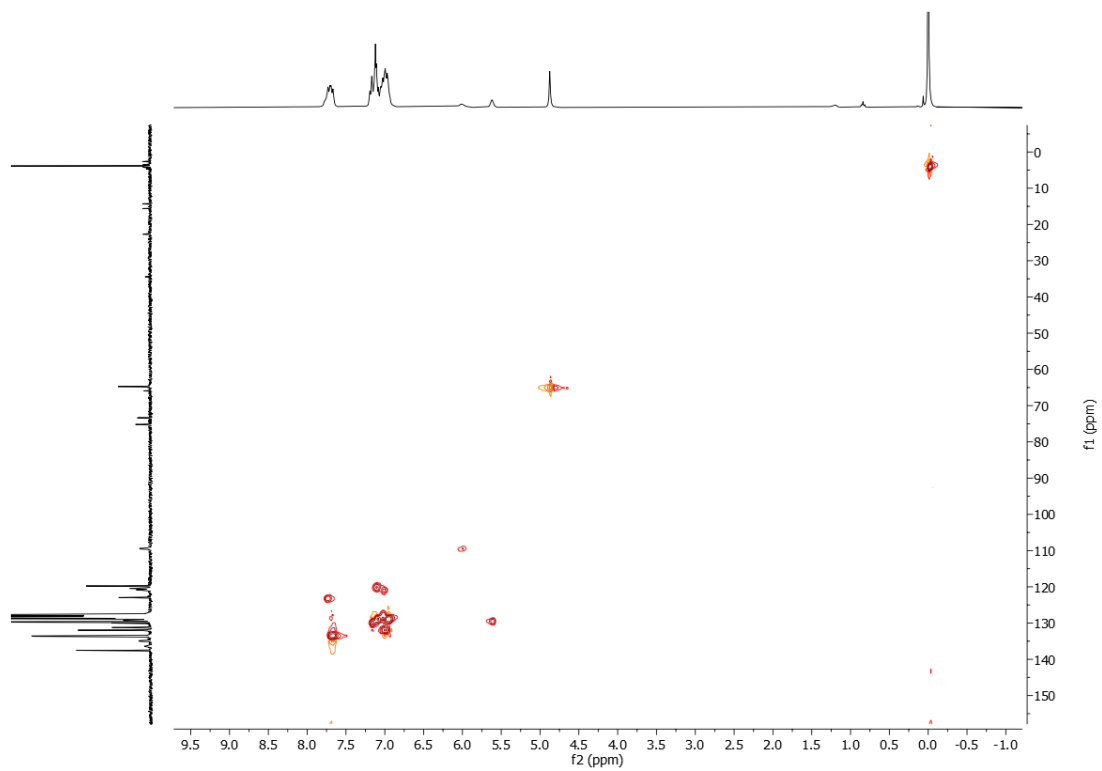

Figure S27.  $^1\text{H}$ - $^{13}\text{C}$  HSQC NMR spectrum of **3-La** recorded from a solution in benzene- $d_6$  at 298 K.

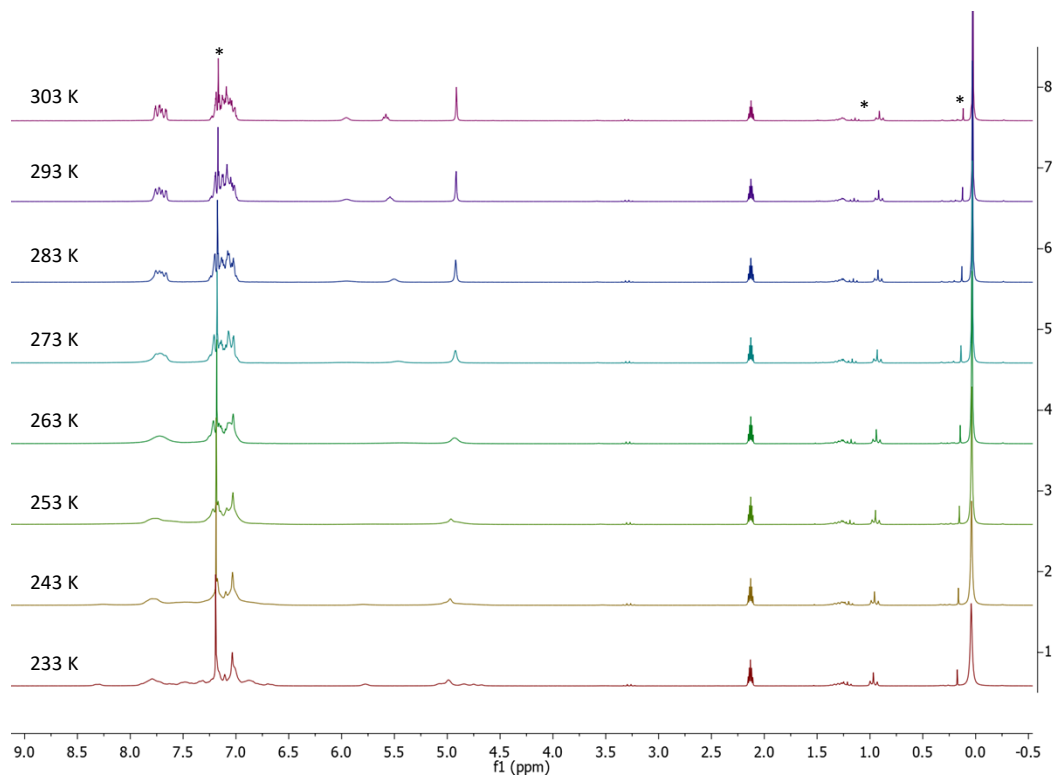

Figure S28.  $^1\text{H}$  VT NMR spectra of **3-La** recorded from a solution in toluene- $d_8$  from 233 to 303 K in 10 K intervals. Trace impurities are marked with an asterisk.

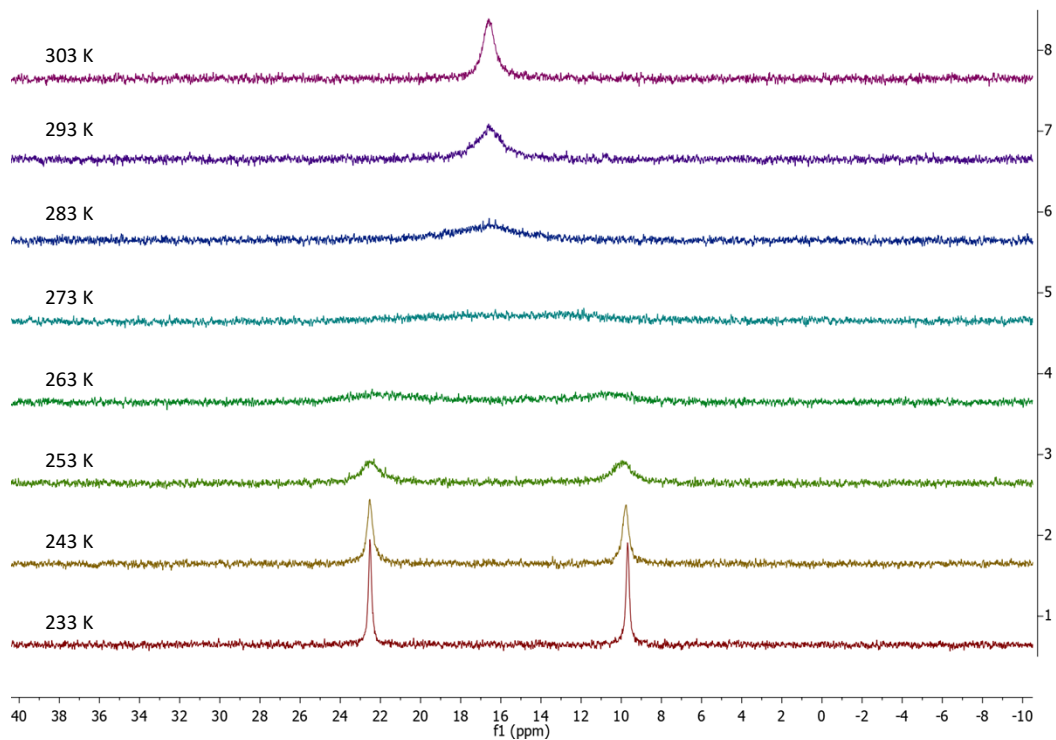

Figure S29.  $^{31}\text{P}\{^1\text{H}\}$  VT NMR spectra of **3-La** recorded from a solution in toluene- $d_8$  from 233 to 303 K in 10 K intervals.

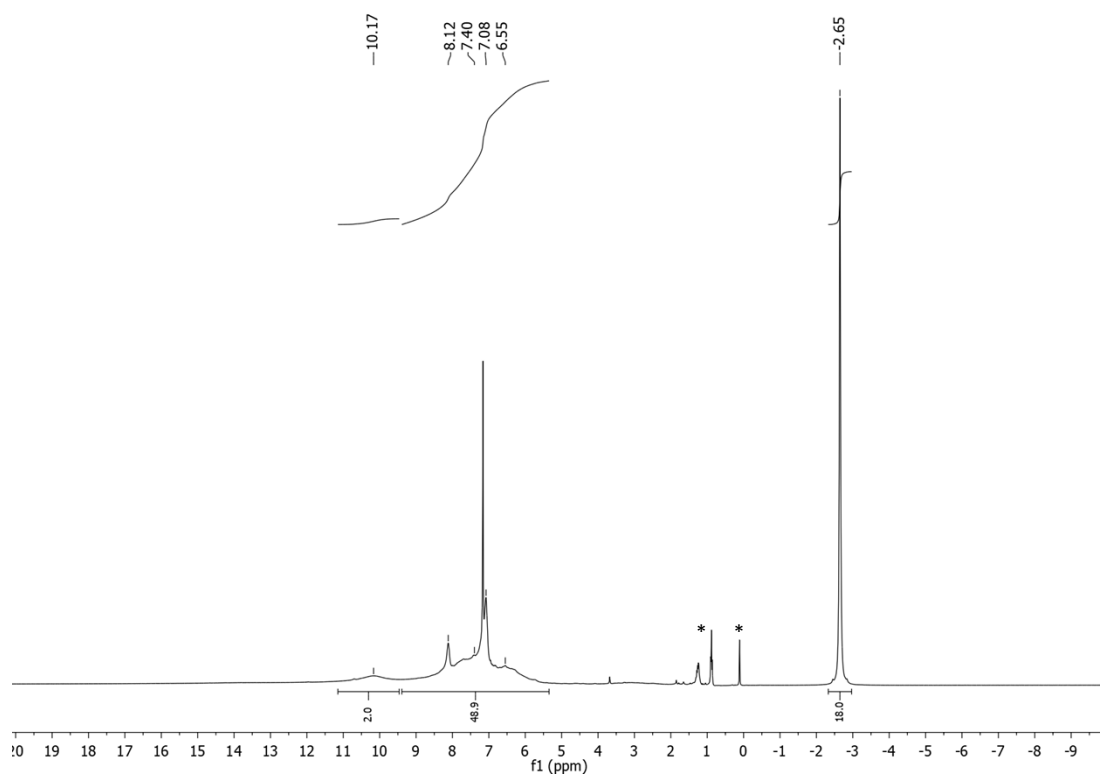

Figure S30.  $^1\text{H}$  NMR spectrum of **3-Sm** recorded from a solution in benzene- $d_6$  at 298 K. Trace impurities are marked with an asterisk.

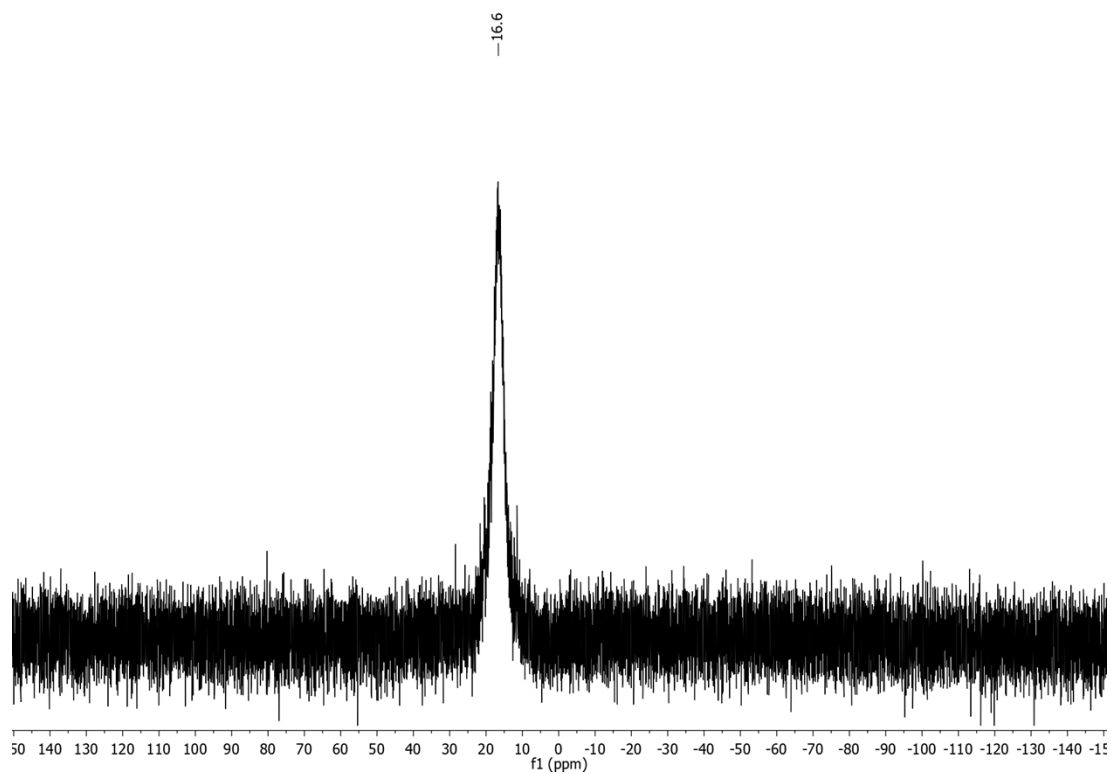

Figure S31.  $^{31}\text{P}\{^1\text{H}\}$  NMR spectrum of **3-Sm** recorded from a solution in benzene- $d_6$  at 298 K.

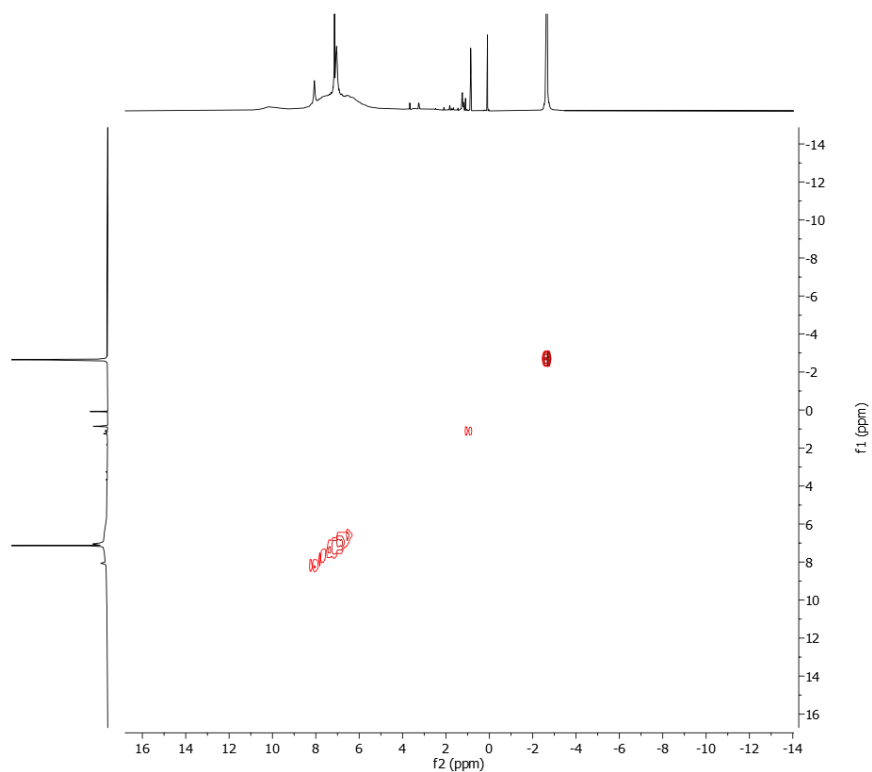

Figure S32.  $^1\text{H}$ - $^1\text{H}$  COSY NMR spectrum of **3-Sm** recorded from a solution in benzene- $d_6$  at 298 K.

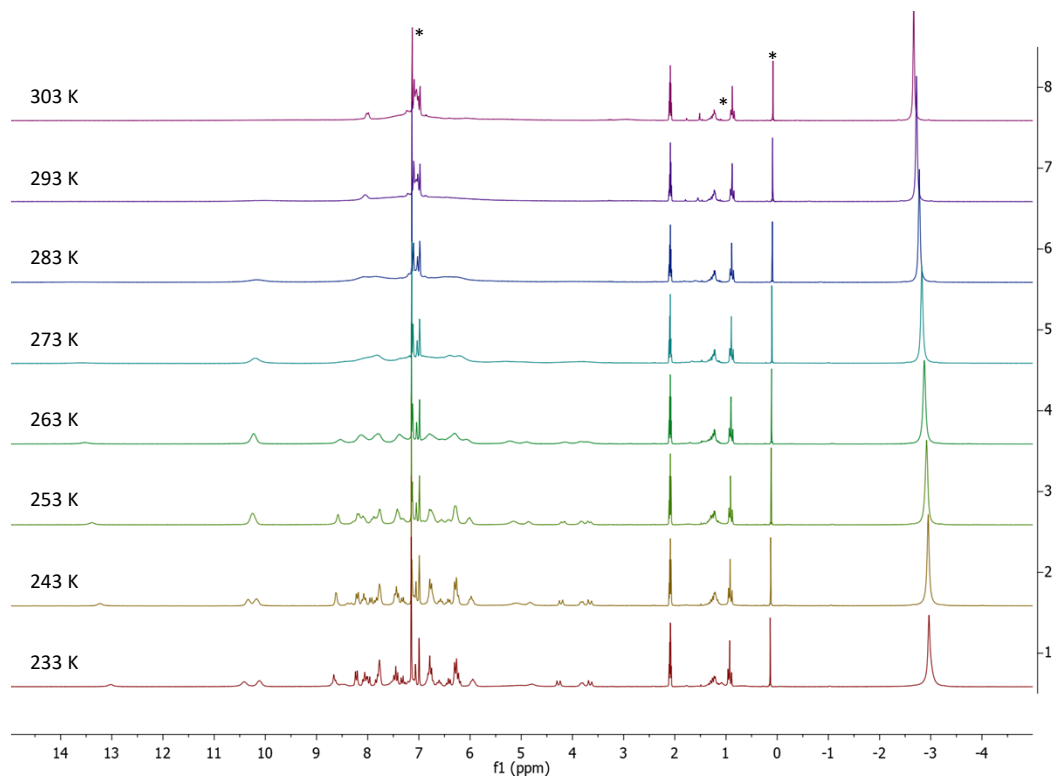

Figure S33.  $^1\text{H}$  VT NMR spectra of **3-Sm** recorded from a solution in toluene- $d_8$  from 233 to 303 K in 10 K intervals. Trace impurities are marked with an asterisk.

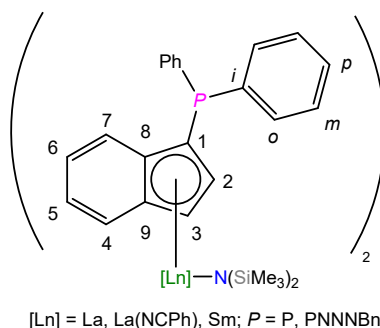

Figure S34: Numbering scheme of the indenyl ligand **1-La** highlighting the individual carbon atoms for assignment via NMR spectroscopy

## UV-Vis Spectroscopy:

The UV-Vis absorption spectra are dominated by the absorption of the aromatic systems in the complexes (Figure S35). The phosphinoindenyl complexes **1-La** and **1-Sm** exhibit shoulders at 315 nm ( $\epsilon = 8.9 \cdot 10^3 \text{ Lmol}^{-1}\text{cm}^{-1}$ ) and 335 nm ( $\epsilon = 1.2 \cdot 10^4 \text{ Lmol}^{-1}\text{cm}^{-1}$ ), respectively, which are attributed to the aromatic systems. The samarium derivative exhibits a broad and weak absorption band at 474 nm ( $\epsilon = 5.9 \cdot 10^2 \text{ Lmol}^{-1}\text{cm}^{-1}$ ). The benzonitrile adduct **2** shows a strong absorption shoulder at 316 nm ( $\epsilon = 1.6 \cdot 10^4 \text{ Lmol}^{-1}\text{cm}^{-1}$ ) and a weak broad band at 571 nm ( $\epsilon = 3.7 \cdot 10^2 \text{ Lmol}^{-1}\text{cm}^{-1}$ ). The phosphazidoindenyl complexes **3-La** and **3-Sm** both exhibit shoulders at 317 nm ( $\epsilon = 1.1 \cdot 10^4 \text{ Lmol}^{-1}\text{cm}^{-1}$ ) and 318 nm ( $\epsilon = 1.7 \cdot 10^4 \text{ Lmol}^{-1}\text{cm}^{-1}$ ) as well as weak bands at 571 nm ( $\epsilon = 3.7 \cdot 10^2 \text{ Lmol}^{-1}\text{cm}^{-1}$ ) and 555 nm ( $\epsilon = 1.5 \cdot 10^2 \text{ Lmol}^{-1}\text{cm}^{-1}$ ), respectively.

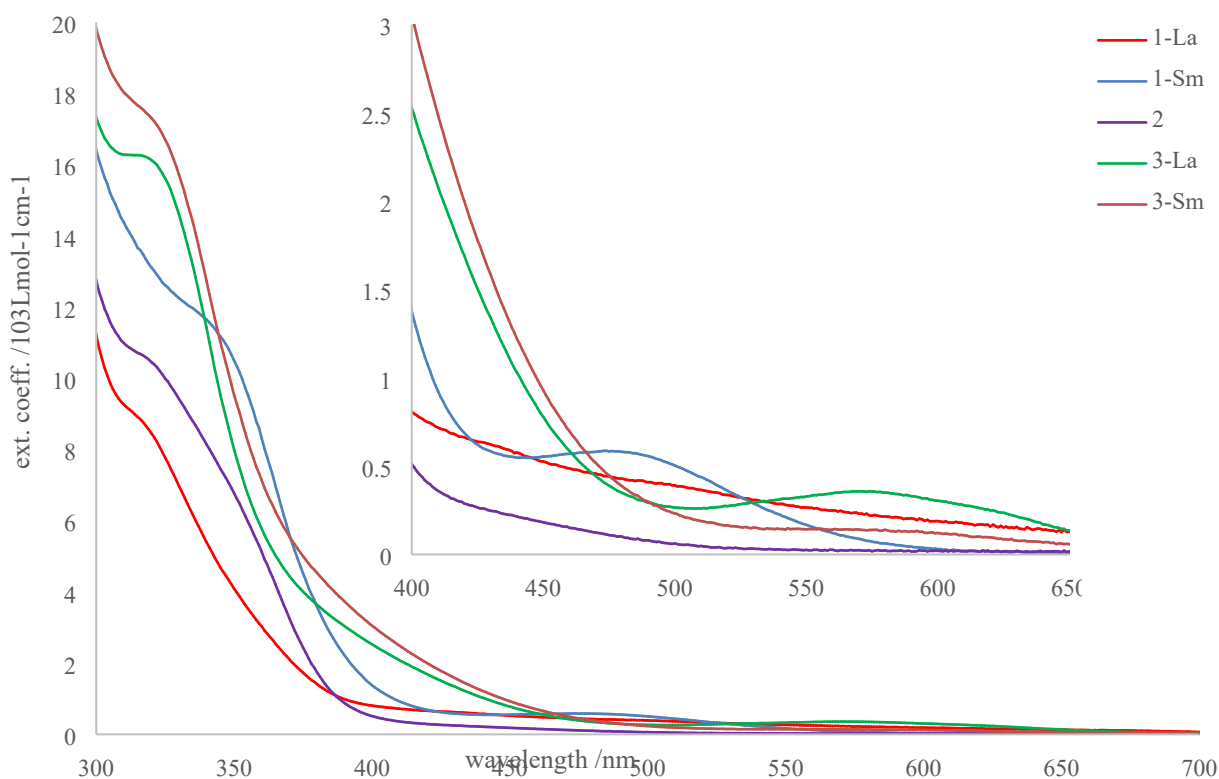

Figure S35. UV-Vis spectra of the complexes **1-La**, **1-Sm**, **2**, **3-La**, and **3-Sm** recorded from 0.05 mM solutions of the compounds in benzene with detail view of range 400 – 650 nm.

## Computational Data:

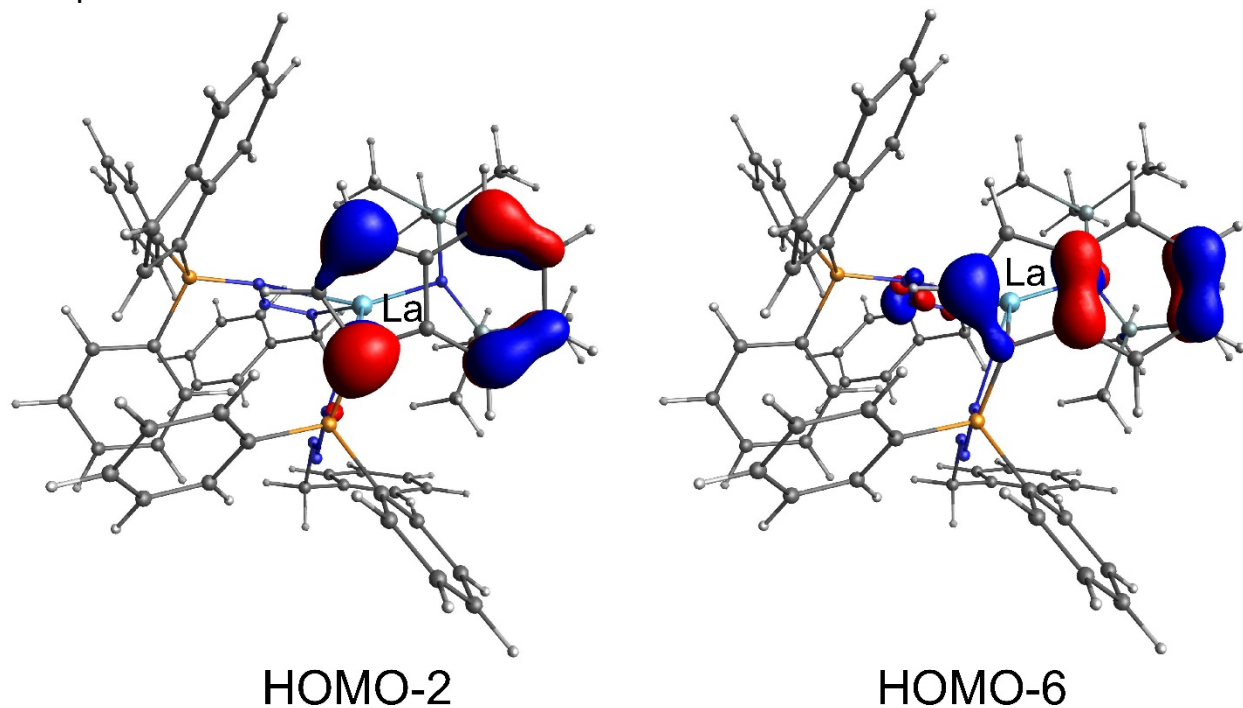

Figure S36. HOMO-2 and HOMO-6 of calculated for **3-La**. DFT calculations performed on the def2-TZVP level of theory using the M06-L functional. The isosurface value for the depicted molecular orbitals is 0.06.

## Cartesian coordinates of the optimized structure of **3-La**:

|    |          |         |          |
|----|----------|---------|----------|
| La | 6.52638  | 4.99199 | 15.84773 |
| P  | 6.09961  | 1.96582 | 13.14114 |
| P  | 5.61316  | 7.04396 | 13.25944 |
| Si | 7.82704  | 4.15809 | 18.84447 |
| Si | 5.76985  | 6.45022 | 18.92843 |
| N  | 4.80234  | 3.08764 | 16.38681 |
| N  | 2.82970  | 5.37970 | 15.04389 |
| N  | 4.94821  | 2.38020 | 15.34621 |
| N  | 6.01933  | 2.76010 | 14.61520 |
| N  | 6.78327  | 5.31582 | 18.18651 |
| N  | 4.74418  | 6.10075 | 14.29897 |
| N  | 3.38118  | 6.19473 | 14.26614 |
| C  | 8.02415  | 5.66339 | 13.47703 |
| H  | 7.80379  | 4.97189 | 12.67424 |
| C  | 9.01383  | 6.63863 | 15.28547 |
| C  | 7.89346  | 7.46001 | 14.92448 |
| C  | 3.63933  | 3.17481 | 12.59157 |
| H  | 3.77630  | 3.71685 | 13.51908 |
| C  | 9.66570  | 3.12068 | 11.88379 |
| C  | 4.76656  | 7.23280 | 17.53578 |
| H  | 5.39306  | 7.72019 | 16.78139 |
| H  | 4.09223  | 8.00379 | 17.91329 |
| H  | 4.12516  | 6.49942 | 17.03025 |
| C  | 9.31819  | 4.88839 | 19.70194 |
| H  | 10.03065 | 4.12190 | 20.01085 |
| H  | 9.02252  | 5.43536 | 20.59795 |

|   |          |          |          |
|---|----------|----------|----------|
| H | 9.84288  | 5.59220  | 19.05543 |
| C | 5.46644  | 6.53191  | 11.53763 |
| C | 7.25969  | 6.82822  | 13.79143 |
| C | 9.83202  | 7.00488  | 16.36667 |
| H | 10.67759 | 6.38266  | 16.63738 |
| C | 4.20596  | 6.18612  | 11.04835 |
| H | 3.34714  | 6.21988  | 11.70994 |
| C | 6.99356  | 2.96992  | 20.02800 |
| H | 6.67721  | 3.46643  | 20.94579 |
| H | 7.65912  | 2.15497  | 20.31754 |
| H | 6.10452  | 2.52368  | 19.58022 |
| C | 10.69830 | 2.18257  | 14.30869 |
| H | 11.11623 | 1.82182  | 15.24105 |
| C | 8.85701  | 3.49519  | 10.77186 |
| H | 9.20426  | 3.99122  | 9.87669  |
| C | 7.49486  | 2.47747  | 12.30430 |
| C | 1.36648  | 5.52482  | 15.02989 |
| H | 1.08029  | 6.38037  | 14.40767 |
| H | 0.94219  | 4.62449  | 14.57477 |
| C | 6.57203  | 6.49383  | 10.68739 |
| H | 7.55417  | 6.75187  | 11.06353 |
| C | 2.74453  | 1.66667  | 16.64193 |
| C | 4.61749  | 2.28880  | 12.15407 |
| C | 9.34957  | 2.01303  | 14.05141 |
| H | 8.71114  | 1.52101  | 14.77936 |
| C | 2.30145  | 2.67592  | 10.65597 |
| H | 1.39809  | 2.82139  | 10.07575 |
| C | 5.72243  | 9.67983  | 12.44667 |
| H | 6.42872  | 9.31994  | 11.70607 |
| C | 11.53057 | 2.81251  | 13.37197 |
| H | 12.58428 | 2.93130  | 13.59311 |
| C | 3.92093  | 10.60041 | 14.34658 |
| H | 3.21725  | 10.96000 | 15.08676 |
| C | 9.55546  | 8.16048  | 17.05955 |
| H | 10.18091 | 8.45219  | 17.89409 |
| C | 3.61005  | 2.76271  | 17.18732 |
| H | 3.04556  | 3.69972  | 17.26723 |
| H | 3.95524  | 2.52428  | 18.19658 |
| C | 8.82111  | 2.47960  | 12.84504 |
| C | 4.52202  | 11.49044 | 13.46879 |
| H | 4.28767  | 12.54618 | 13.52315 |
| C | 2.48104  | 3.35945  | 11.84845 |
| H | 1.72258  | 4.04918  | 12.20248 |
| C | 5.16188  | 5.74967  | 8.88809  |
| H | 5.04510  | 5.43505  | 7.85838  |
| C | 8.44249  | 3.11686  | 17.38603 |
| H | 7.64511  | 2.56260  | 16.87225 |
| H | 9.13364  | 2.34735  | 17.73129 |
| H | 9.00655  | 3.67421  | 16.62698 |
| C | 6.41451  | 6.10396  | 9.36596  |
| H | 7.27883  | 6.05979  | 8.71553  |
| C | 7.55842  | 3.10898  | 11.02711 |
| H | 6.70675  | 3.26871  | 10.37912 |
| C | 11.02608 | 3.27594  | 12.17038 |
| H | 11.68325 | 3.75752  | 11.45455 |
| C | 4.43108  | 1.60096  | 10.95262 |
| H | 5.18690  | 0.90255  | 10.60987 |

|   |          |          |          |
|---|----------|----------|----------|
| C | 6.02364  | 0.17562  | 13.42455 |
| C | -0.36493 | 4.79763  | 18.33043 |
| H | -0.98621 | 4.02617  | 18.76792 |
| C | 5.12387  | 8.78065  | 13.32991 |
| C | 5.42399  | 11.02967 | 12.51842 |
| H | 5.89413  | 11.72295 | 11.83277 |
| C | 2.68279  | 0.41976  | 17.25190 |
| H | 3.25612  | 0.24011  | 18.15454 |
| C | 3.28355  | 1.80272  | 10.20360 |
| H | 3.14766  | 1.26791  | 9.27187  |
| C | 2.00813  | 1.87383  | 15.47648 |
| H | 2.07635  | 2.83688  | 14.98423 |
| C | 8.46973  | 8.97412  | 16.69601 |
| H | 8.28284  | 9.88675  | 17.24821 |
| C | 4.21938  | 9.24703  | 14.28189 |
| H | 3.75770  | 8.55268  | 14.97238 |
| C | 7.10074  | -0.62793 | 13.05479 |
| H | 7.98352  | -0.16762 | 12.62576 |
| C | 4.87305  | -0.41522 | 13.95522 |
| H | 4.02550  | 0.20024  | 14.23538 |
| C | 4.05751  | 5.79232  | 9.72945  |
| H | 3.07938  | 5.51144  | 9.35964  |
| C | 0.06283  | 4.67551  | 17.01556 |
| H | -0.21731 | 3.80531  | 16.43192 |
| C | 0.85812  | 5.65815  | 16.43580 |
| C | 7.63898  | 8.63737  | 15.64971 |
| H | 6.81450  | 9.28742  | 15.38271 |
| C | 4.52324  | 5.70187  | 20.11236 |
| H | 3.93533  | 4.91667  | 19.63381 |
| H | 3.82047  | 6.45551  | 20.47284 |
| H | 4.99707  | 5.26146  | 20.98990 |
| C | 7.03370  | -2.00348 | 13.22377 |
| H | 7.87328  | -2.62153 | 12.93144 |
| C | 9.06114  | 5.52931  | 14.39005 |
| H | 9.82073  | 4.75958  | 14.36691 |
| C | 6.68896  | 7.80402  | 19.83323 |
| H | 7.42655  | 8.27612  | 19.18439 |
| H | 7.22387  | 7.41044  | 20.69858 |
| H | 6.01656  | 8.58209  | 20.19861 |
| C | 0.00597  | 5.90215  | 19.08260 |
| H | -0.32348 | 5.99615  | 20.10954 |
| C | 0.79906  | 6.88946  | 18.51200 |
| H | 1.09063  | 7.75578  | 19.09355 |
| C | 1.21709  | 6.76768  | 17.19757 |
| H | 1.83466  | 7.53866  | 16.74925 |
| C | 5.89198  | -2.58431 | 13.75574 |
| H | 5.83826  | -3.65908 | 13.87970 |
| C | 4.81335  | -1.78913 | 14.12105 |
| H | 3.91709  | -2.23813 | 14.53120 |
| C | 1.89785  | -0.59474 | 16.71730 |
| H | 1.85682  | -1.55892 | 17.20906 |
| C | 1.23105  | 0.86514  | 14.93332 |
| C | 1.17236  | -0.37629 | 15.55650 |
| H | 0.56312  | -1.16759 | 15.13724 |
| H | 0.67658  | 1.04370  | 14.01942 |
